# Supplementary material for: Total synthesis of haliclamide
Source: Royal Society of Chemistry journal article supplement (doi:10.1039/c6ob01775d), 2016-01-01
Supplement: c6ob01775d1.pdf [file c6ob01775d1.pdf]

**Electronic Supplementary Information for**

**Total Synthesis of Haliclamide**

Suraksha Gahalawat and Satyendra Kumar Pandey\*

*School of Chemistry and Biochemistry, Thapar University, Patiala 147001, India*

\*Corresponding Author: Phone: +91-175-239-3832, Fax No. +91-175-236-4498

E-mail address: [skpandey@thapar.edu](mailto:skpandey@thapar.edu)

**Table of contents**

**General Experimental**

|                                                                       |                |
|-----------------------------------------------------------------------|----------------|
| 1. General Information                                                | <b>S1</b>      |
| 2. <sup>1</sup> H and <sup>13</sup> C spectra for compound <b>9</b>   | <b>S2-S3</b>   |
| 3. <sup>1</sup> H and <sup>13</sup> C spectra for compound <b>12</b>  | <b>S4-S5</b>   |
| 4. <sup>1</sup> H and <sup>13</sup> C spectra for compound <b>8</b>   | <b>S6-S7</b>   |
| 5. HPLC data for compound <b>8</b>                                    | <b>S8-S9</b>   |
| 6. <sup>1</sup> H and <sup>13</sup> C spectra for compound <b>13</b>  | <b>S10-S11</b> |
| 7. <sup>1</sup> H and <sup>13</sup> C spectra for compound <b>14</b>  | <b>S12-S13</b> |
| 8. <sup>1</sup> H and <sup>13</sup> C spectra for compound <b>15</b>  | <b>S14-S15</b> |
| 9. <sup>1</sup> H and <sup>13</sup> C spectra for compound <b>6</b>   | <b>S16-S17</b> |
| 10. <sup>1</sup> H and <sup>13</sup> C spectra for compound <b>4</b>  | <b>S18-S19</b> |
| 11. <sup>1</sup> H and <sup>13</sup> C spectra for compound <b>16</b> | <b>S20-S21</b> |
| 12. <sup>1</sup> H and <sup>13</sup> C spectra for compound <b>2</b>  | <b>S22-S23</b> |
| 13. <sup>1</sup> H and <sup>13</sup> C spectra for compound <b>1</b>  | <b>S24-S25</b> |
| 14. Data for natural and synthetic haliclamide <b>1</b>               | <b>S26</b>     |

**General Information**

All reactions sensitive to air or moisture were carried out under nitrogen or argon atmosphere with anhydrous solvents. All reagents were purchased from commercial suppliers and used without further purification unless otherwise noted. <sup>1</sup>H and <sup>13</sup>C NMR (400 and 100 MHz, respectively) spectra were recorded and chemical shifts are reported in ppm ( $\delta$ ) relative to tetramethylsilane (TMS) with the solvent resonance employed as the internal standard. Data are reported as follows: chemical shift, multiplicity (s = singlet, d = doublet, dd = doublet of doublet, td = triplet of doublet, t = triplet, q = quartet, m = multiplet), coupling constants (Hz) and integration. ESI-HRMS spectra were recorded on Mass Q-TOF.

<sup>1</sup>H NMR (400 MHz, CDCl<sub>3</sub>/TMS)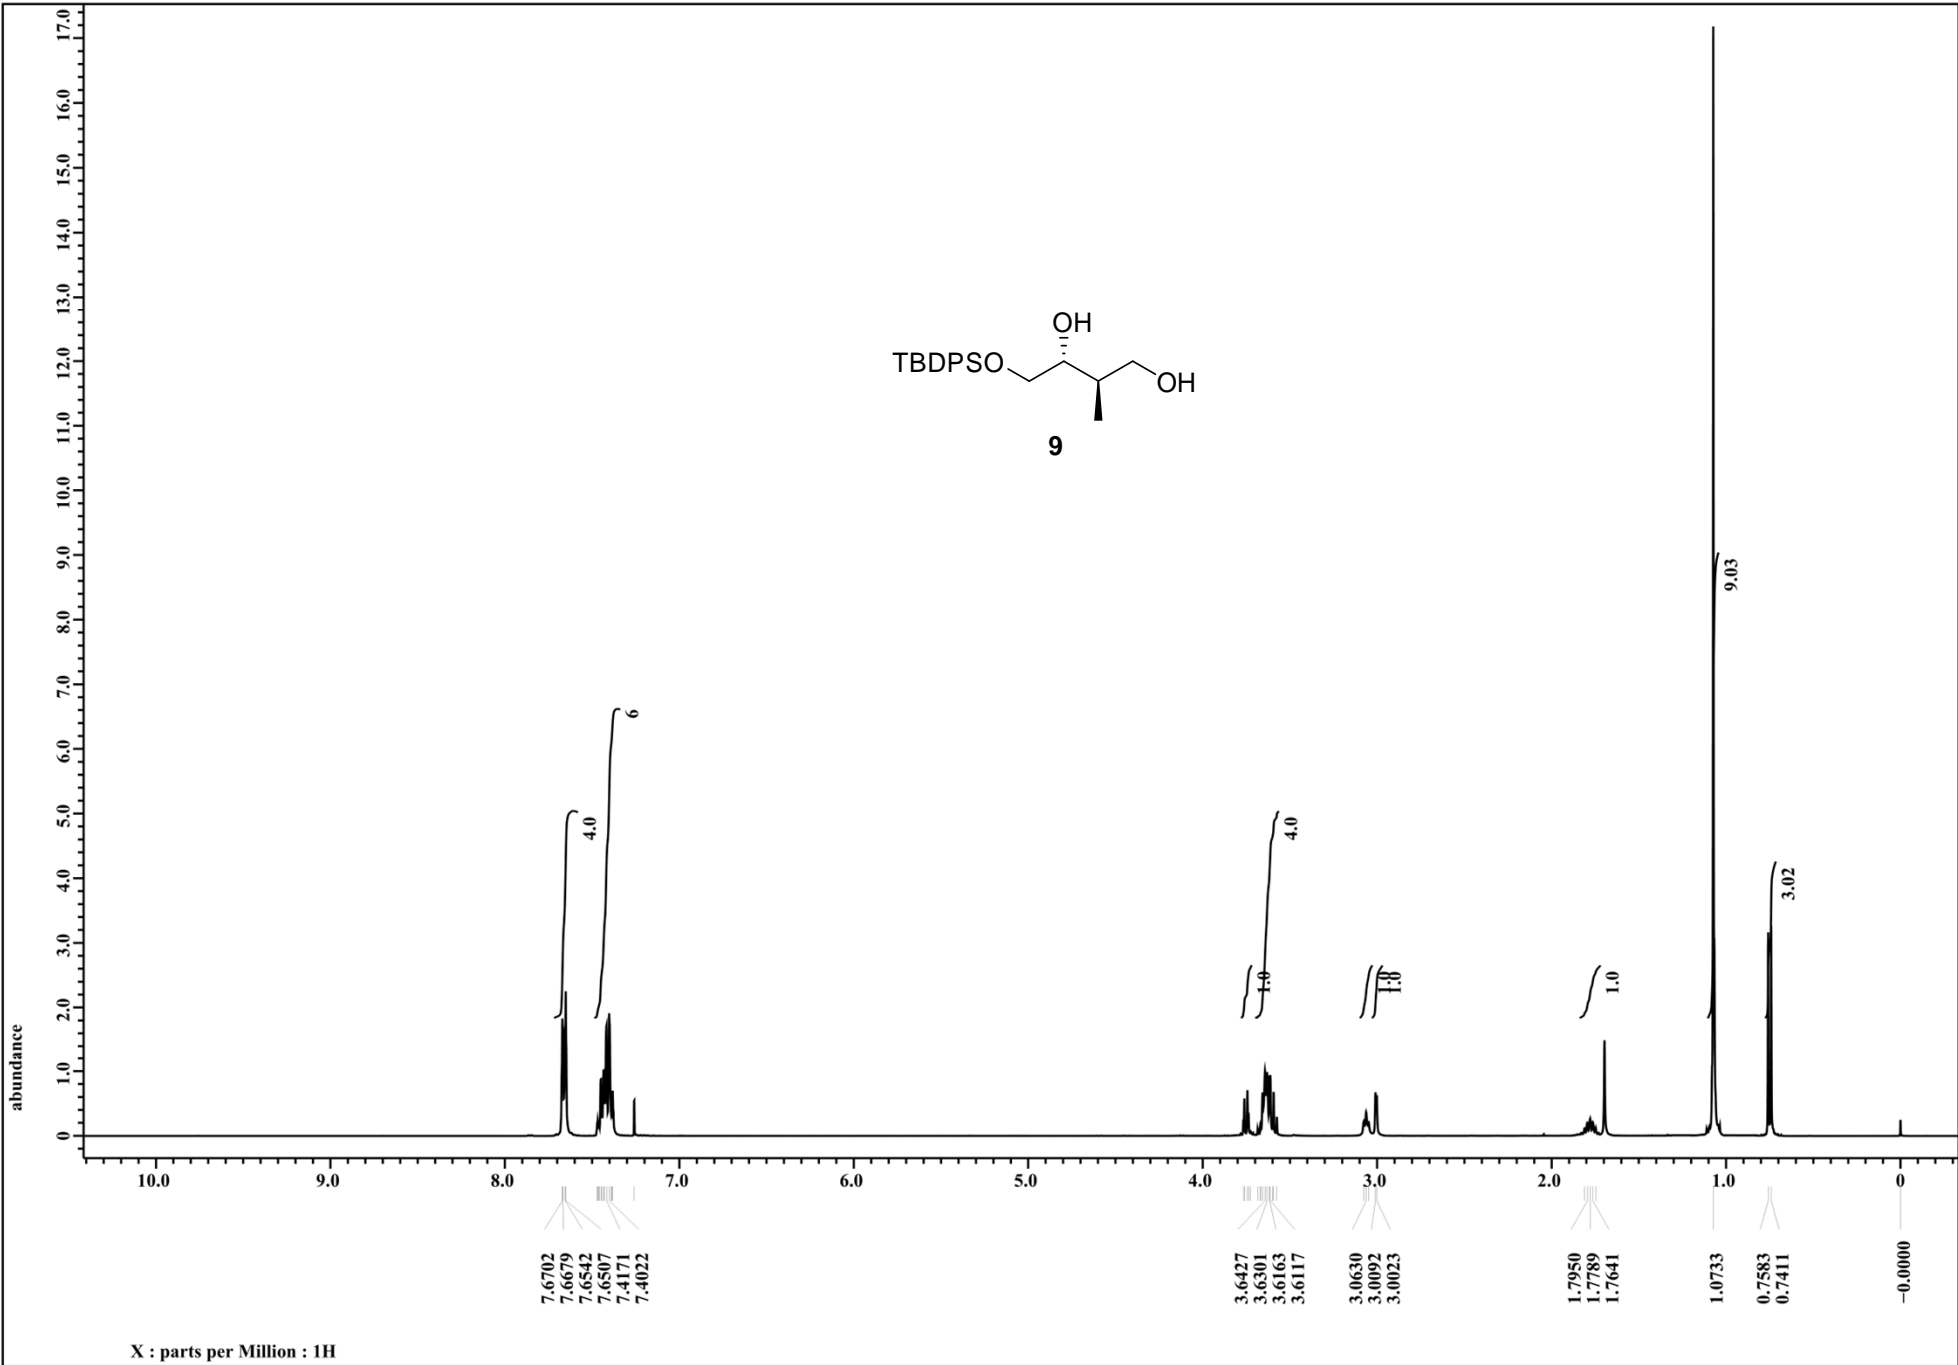

$^{13}\text{C}$  NMR (100 MHz,  $\text{CDCl}_3$ )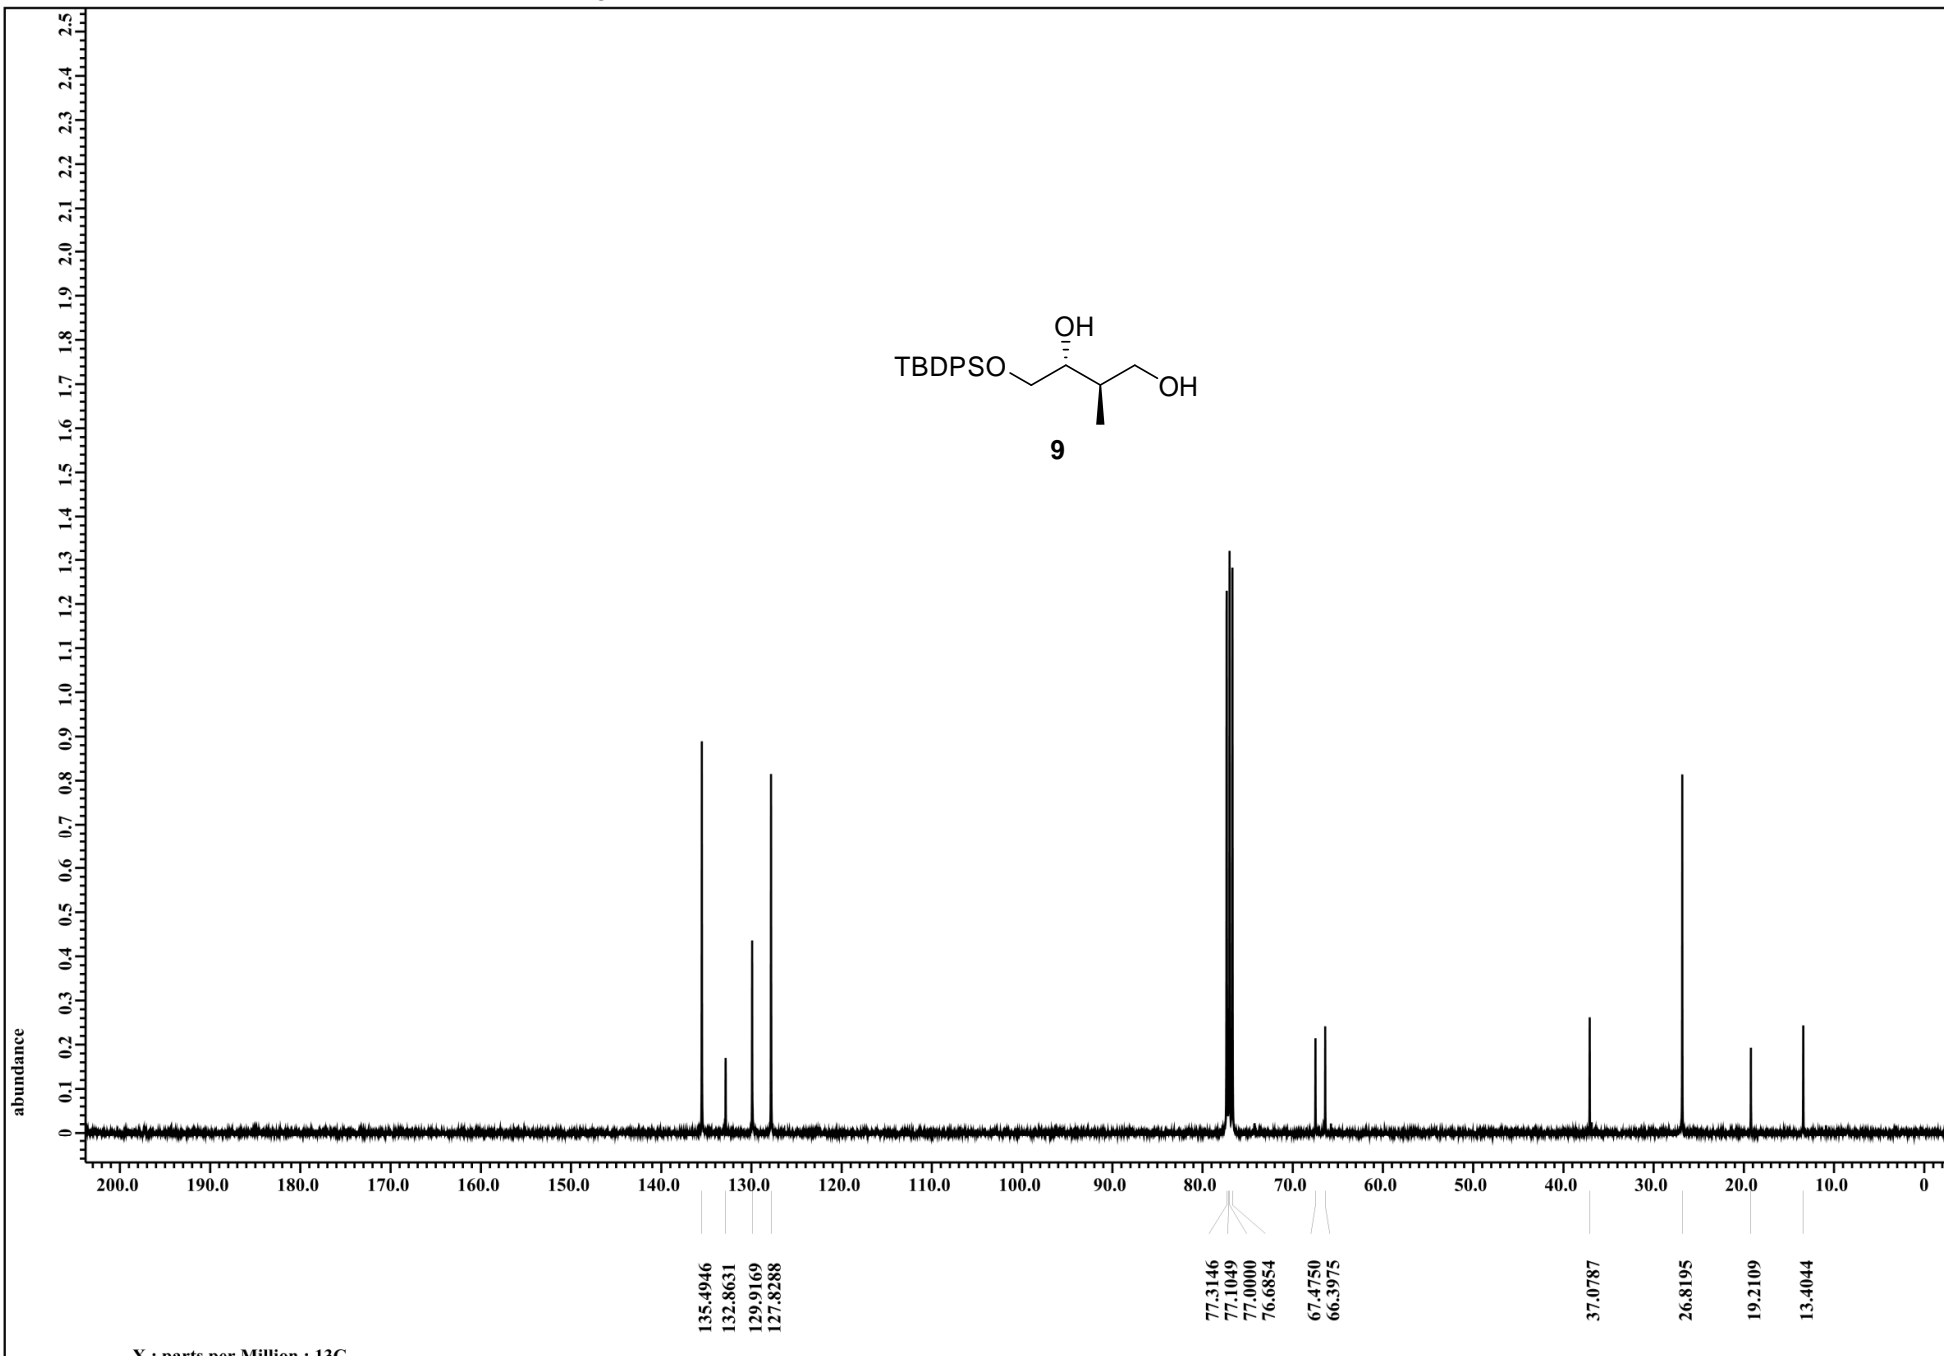

$^1\text{H}$  NMR (400 MHz,  $\text{CDCl}_3/\text{TMS}$ )

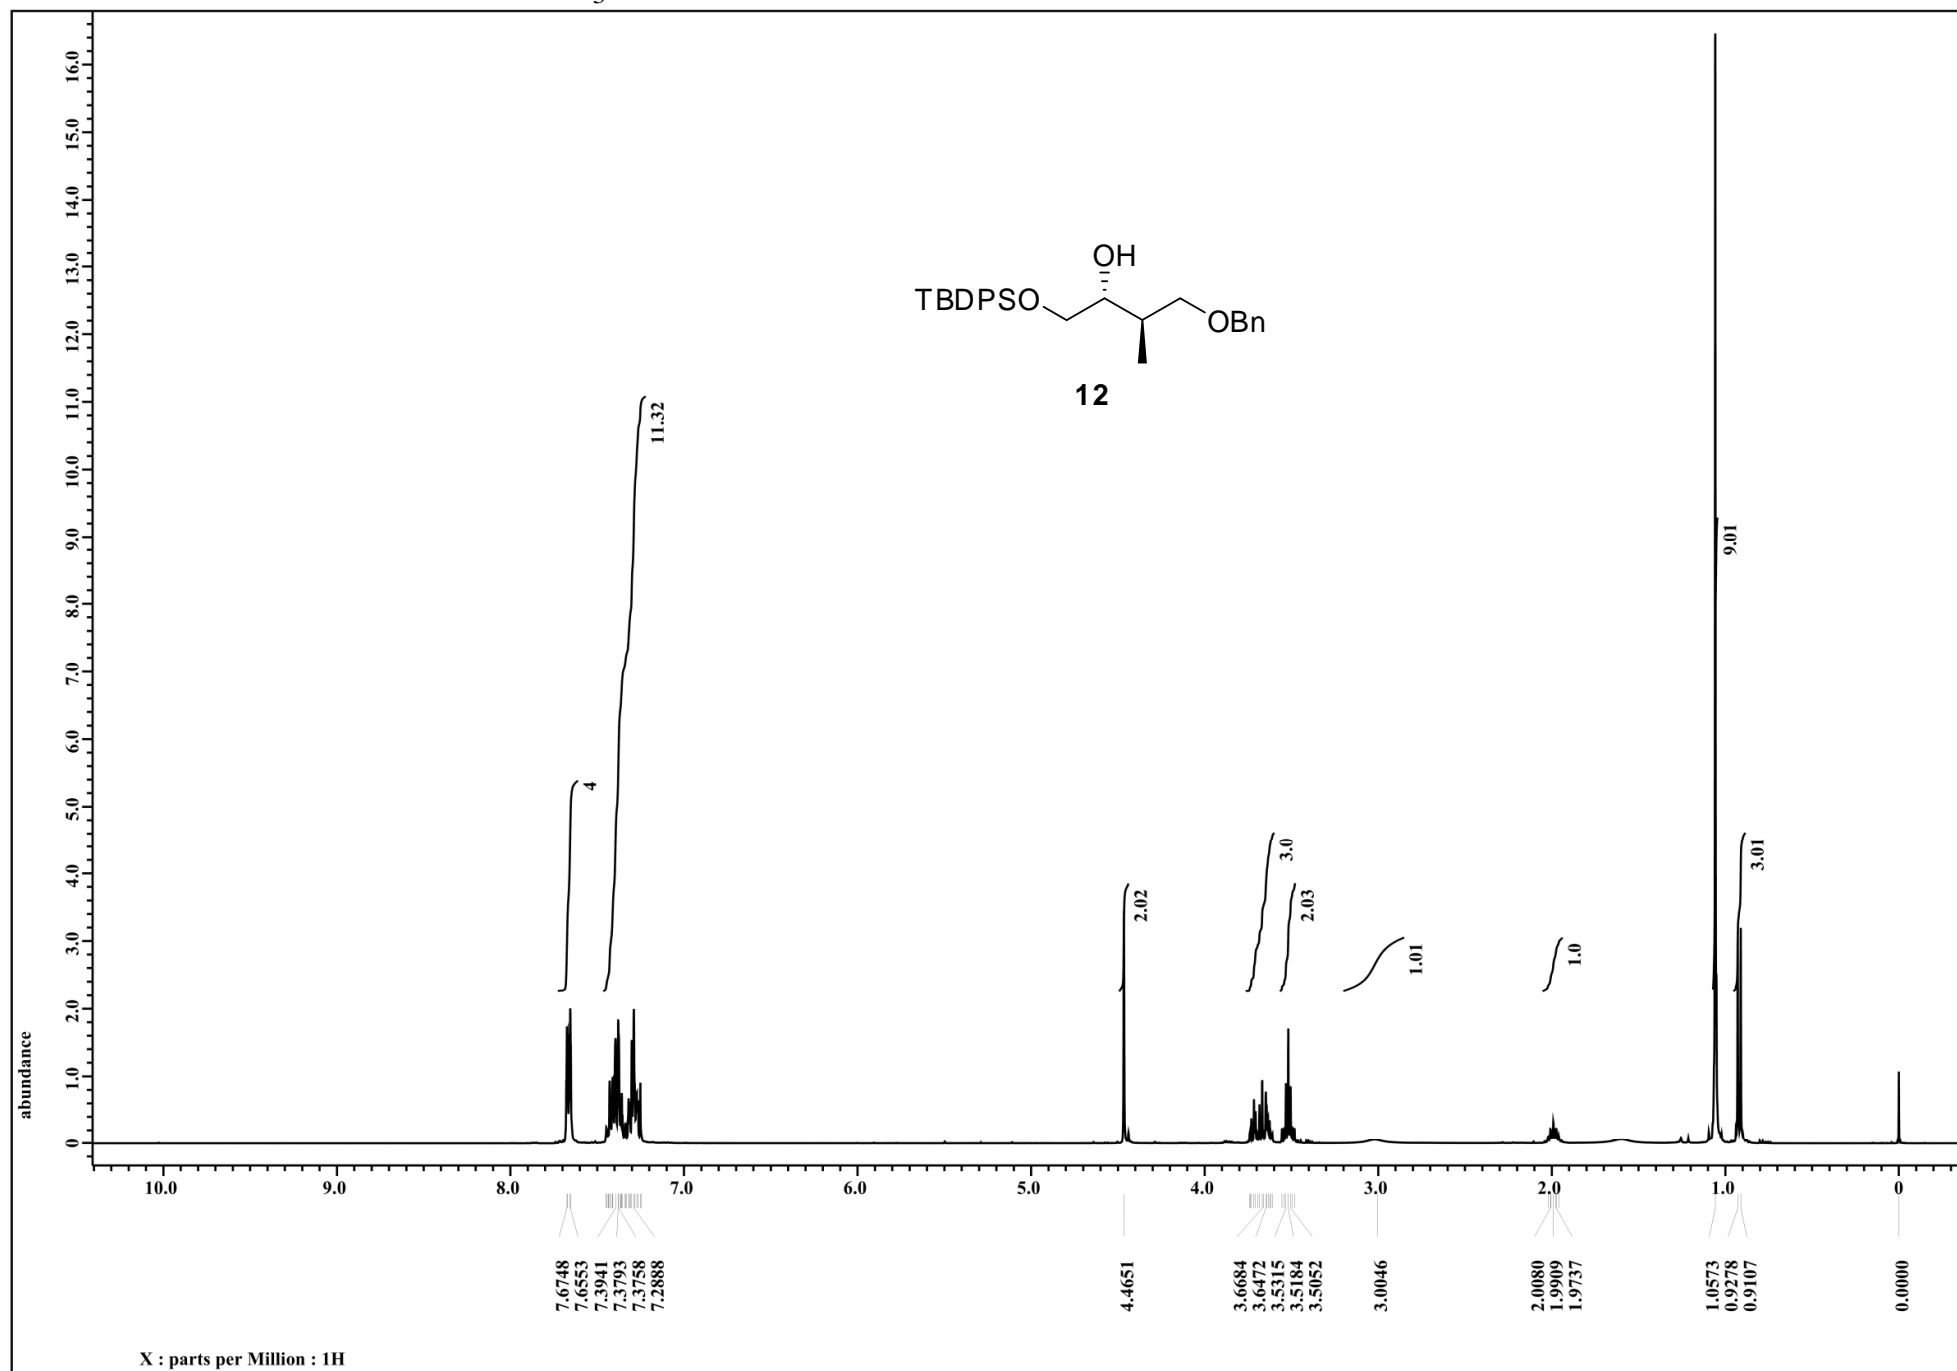

$^{13}\text{C}$  NMR (100 MHz,  $\text{CDCl}_3$ )

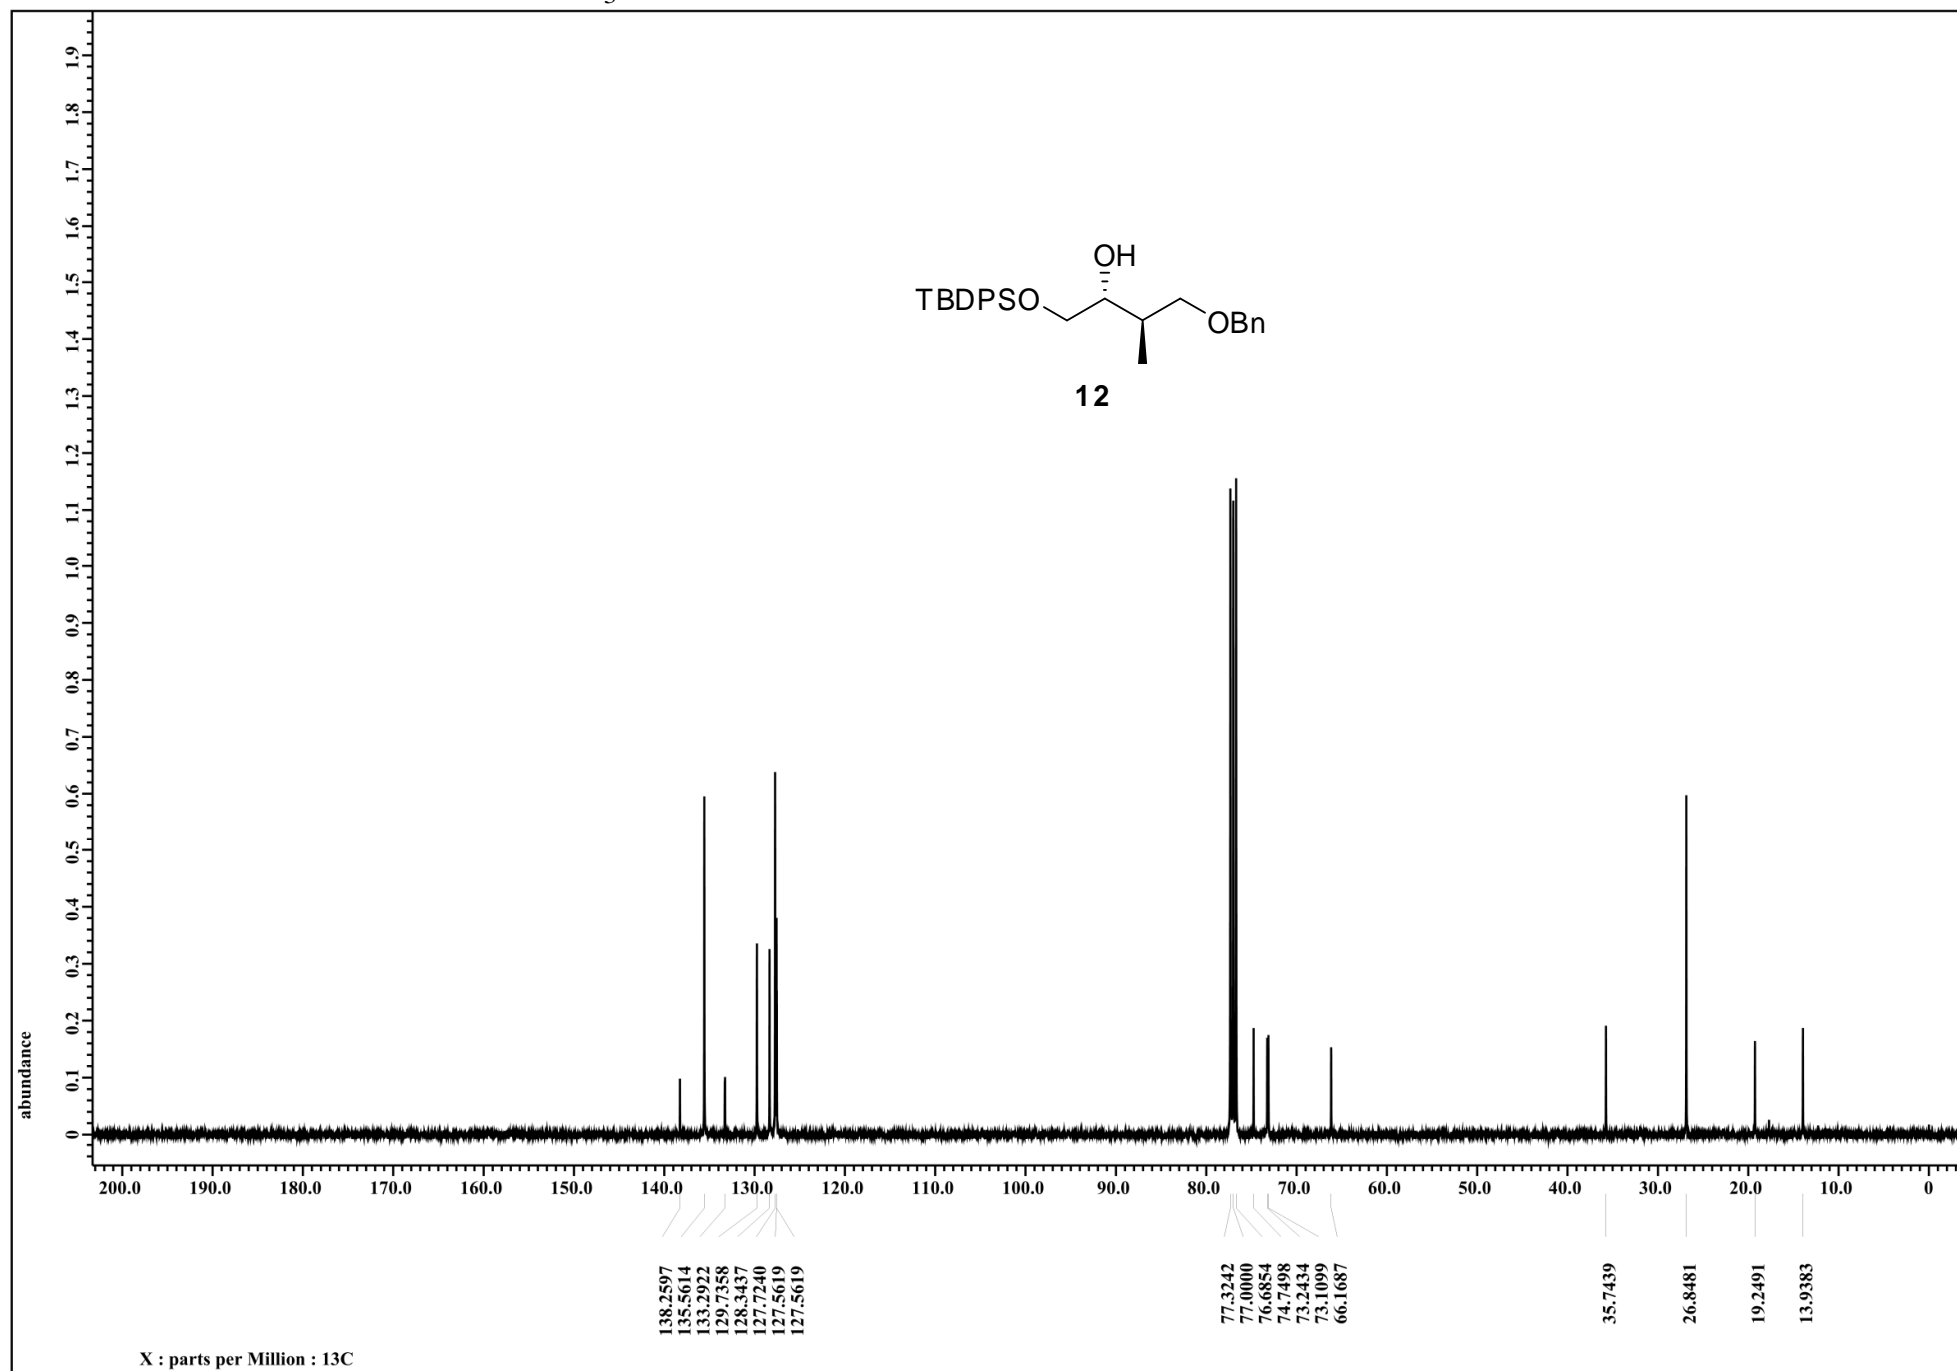

$^1\text{H}$  NMR (400 MHz,  $\text{CDCl}_3/\text{TMS}$ )

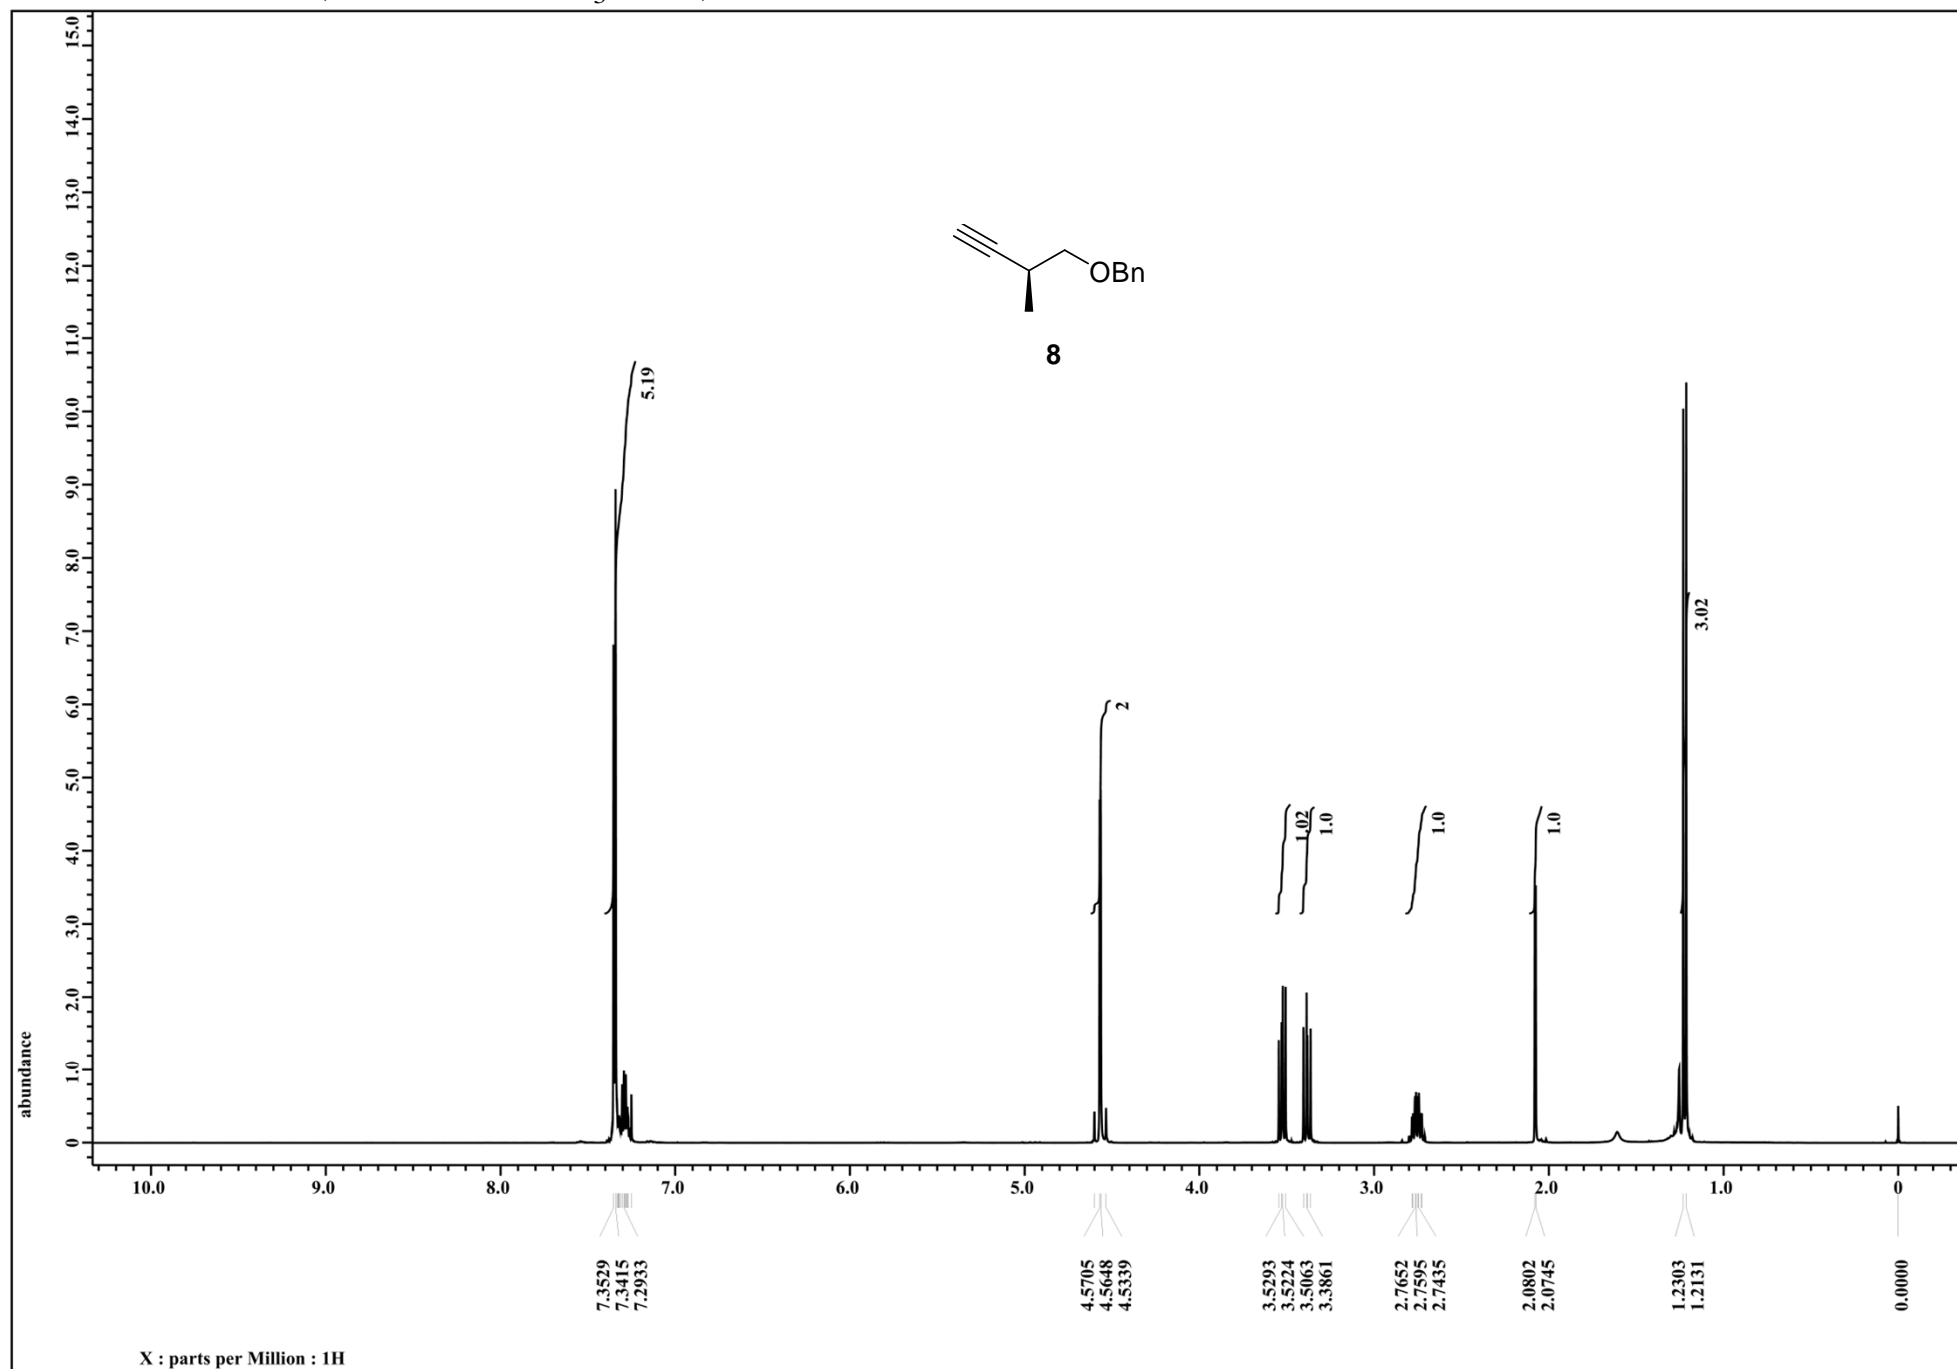

$^{13}\text{C}$  NMR (100 MHz,  $\text{CDCl}_3$ )

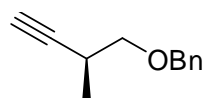

**8**

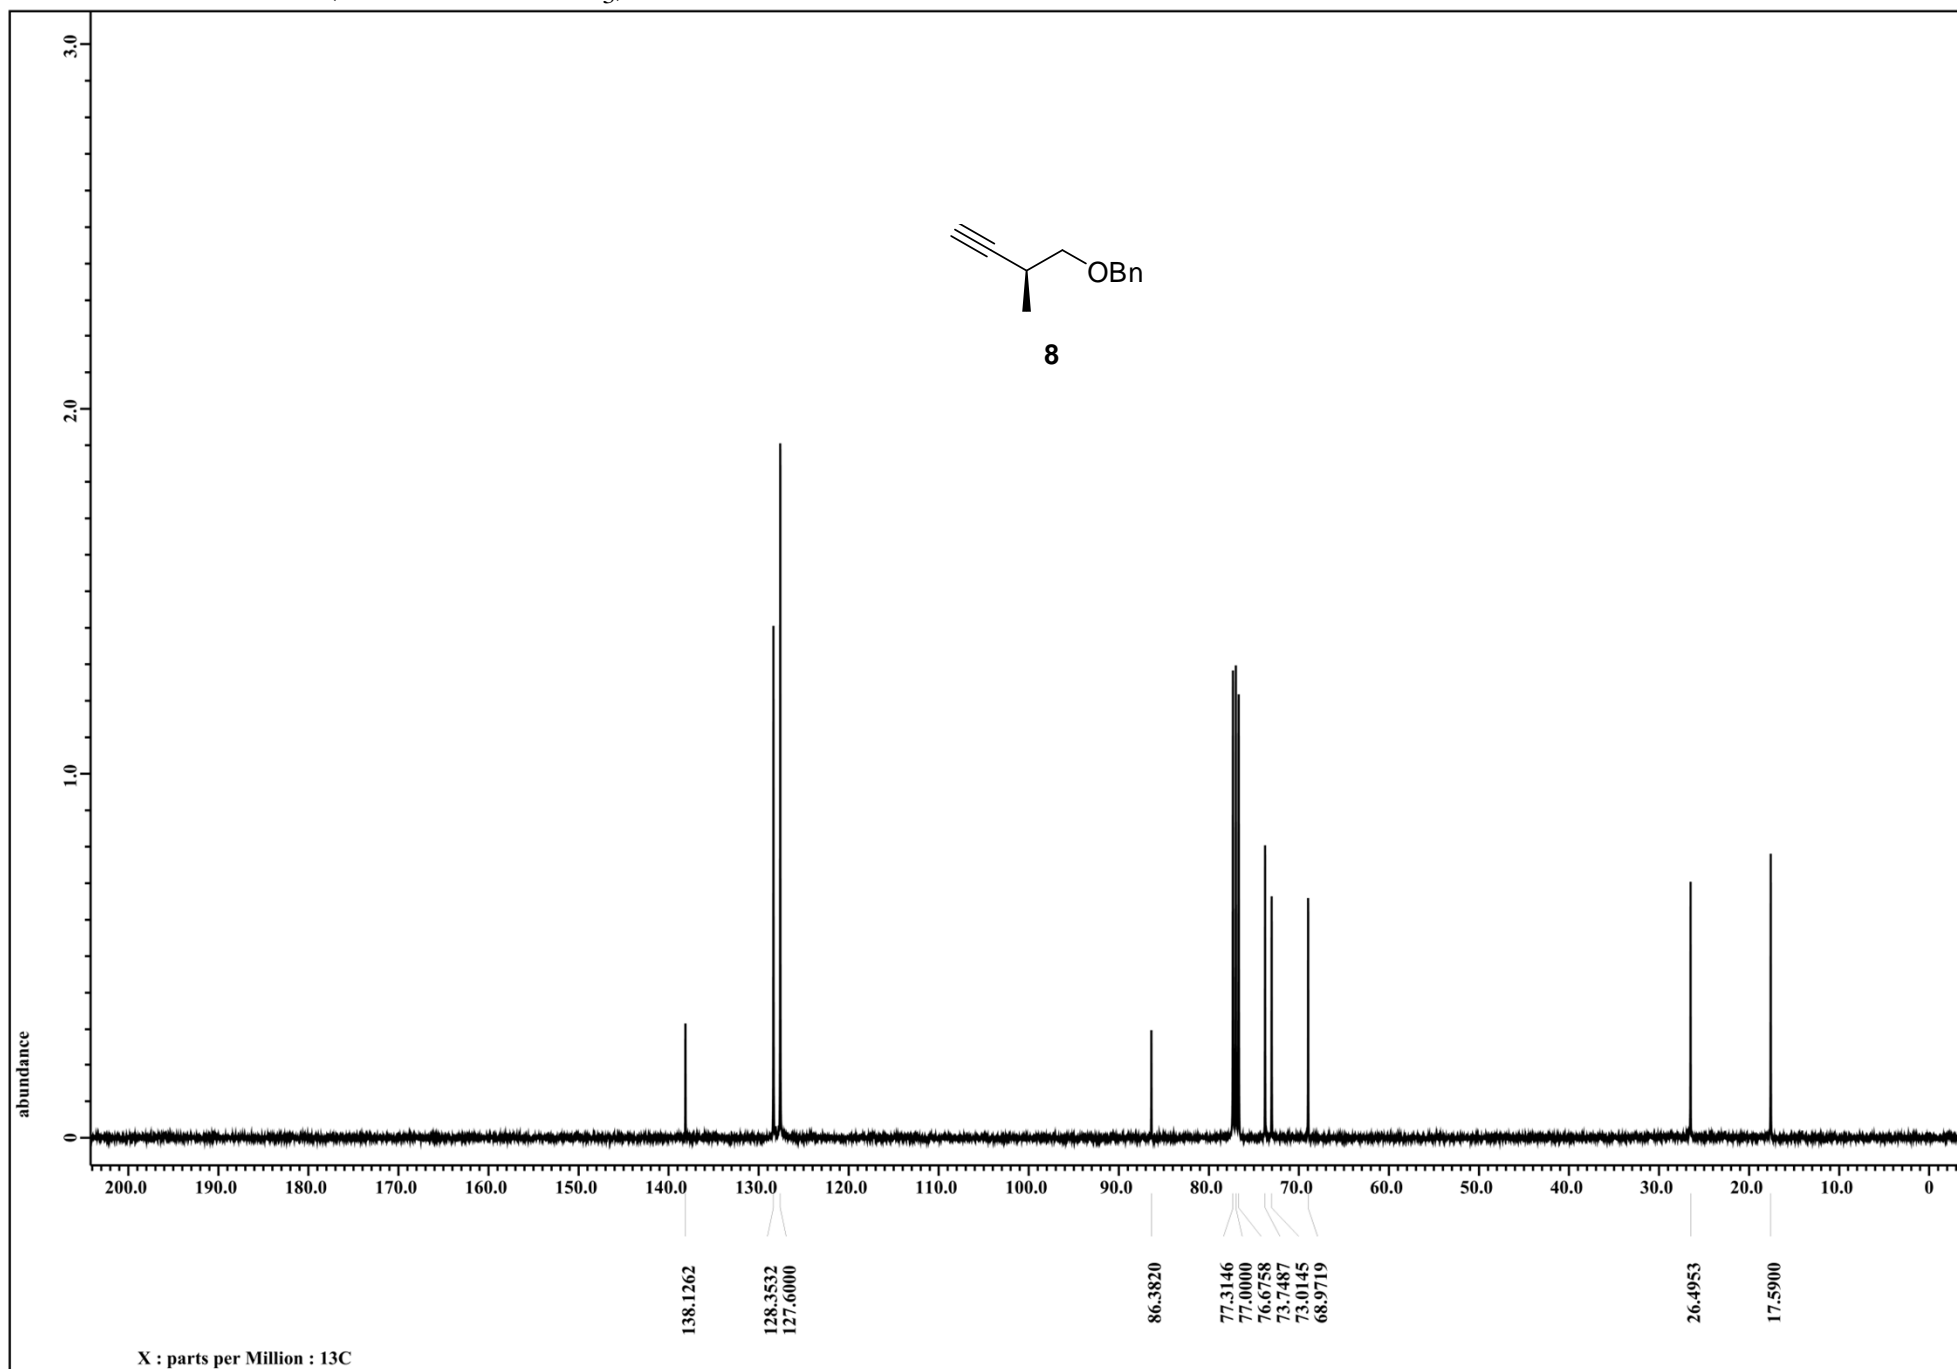

# Racemic 8

## D-7000 HPLC System Manager Report

Analyzed: 07/15/16 12:40 PM

Reported: 07/15/16 01:56 PM

Processed: 07/15/16 01:56 PM

Data Path: C:\WIN32APP\HSM\HPLC\DATA\8991\

Processing Method: SANTOSHH

System(acquisition): Sys 1

Series:8991

Application: HPLC

Volume: 10.0 ul

Sample Name: BENZYL-Rac

Injection from this vial: 1 of 1

Sample Description: MEOH:H2O (85:15)

Chrom Type: HPLC Channel : 1

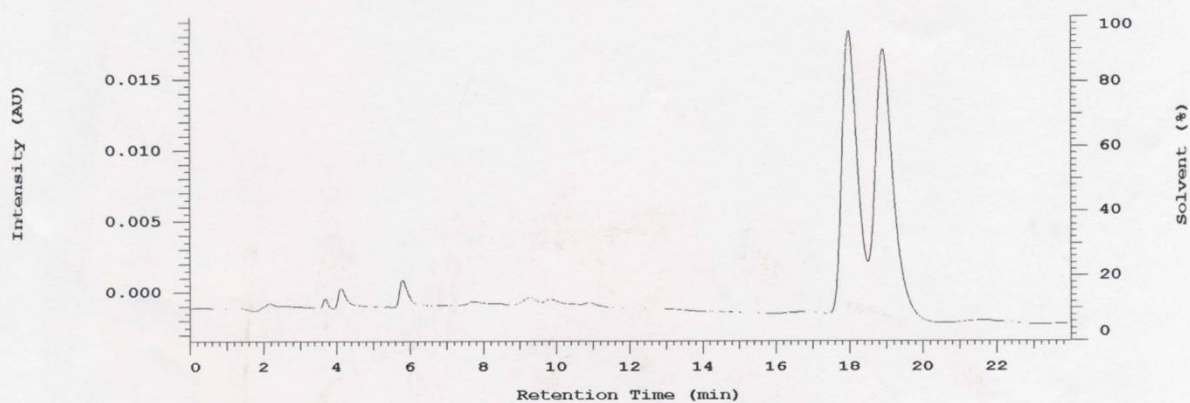

| No. | RT    | Height | Area   | Area %  |
|-----|-------|--------|--------|---------|
| 1   | 17.97 | 9911   | 287710 | 48.144  |
| 2   | 18.90 | 9294   | 309894 | 51.856  |
|     |       | 19205  | 597604 | 100.000 |

Peak rejection level: 0

COLUMN :chiralcel OJ-RH(150 X 4.6mm)  
MOBILE PHASE :-MEOH:H2O(85:15)  
WAVELENGTH :- 254nm  
FLOW RATE :- 0.5 ml/min (880 psi)  
SAMPLE CONC :-1 mg/1 ml Injection vol: 2 ul



# Chiral 8

## D-7000 HPLC System Manager Report

Analyzed: 07/15/16 01:09 PM

Reported: 07/15/16 01:55 PM

Processed: 07/15/16 01:55 PM

Data Path: C:\WIN32APP\HSM\HPLC\DATA\8992\

Processing Method: SANTOSHH

System(acquisition): Sys 1

Series:8992

Application: HPLC

Volume: 10.0 ul

Sample Name: BENZYL-Chiral

Injection from this vial: 1 of 1

Sample Description: MEOH:H2O(85:15)

Chrom Type: HPLC Channel : 1

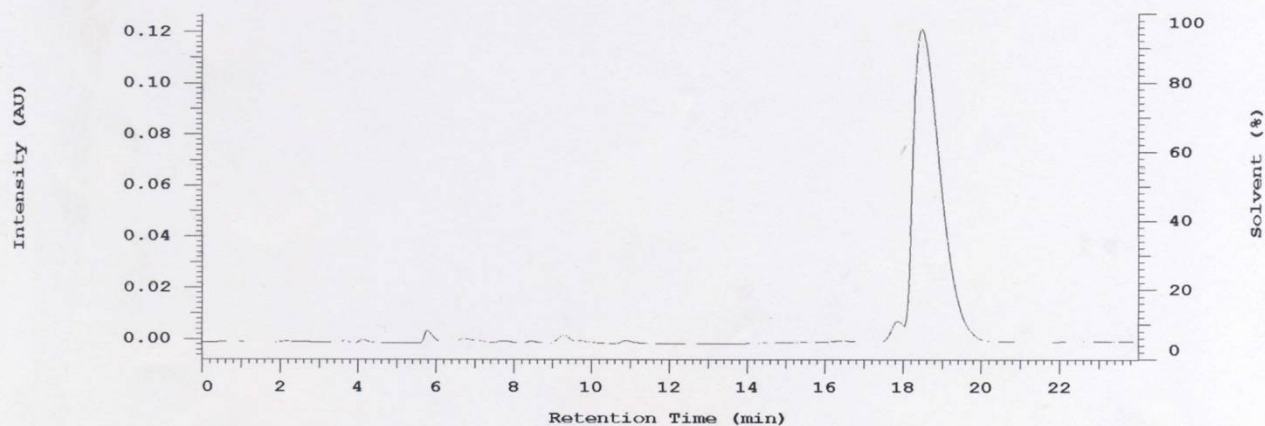

| No. | RT    | Height | Area    | Area %  |
|-----|-------|--------|---------|---------|
| 1   | 17.87 | 3947   | 76375   | 2.565   |
| 2   | 18.48 | 60703  | 2900988 | 97.435  |
|     |       | 64650  | 2977363 | 100.000 |

Peak rejection level: 0

COLUMN :chiralcel OJ-RH(150 X 4.6mm)  
MOBILE PHASE :-MEOH:H2O(85:15)  
WAVELENGTH :- 254nm  
FLOW RATE :- 0.5 ml/min (880 psi)  
SAMPLE CONC :-1 mg/1 ml Injection vol: 2 ul

<sup>1</sup>H NMR (400 MHz, CDCl<sub>3</sub>/TMS)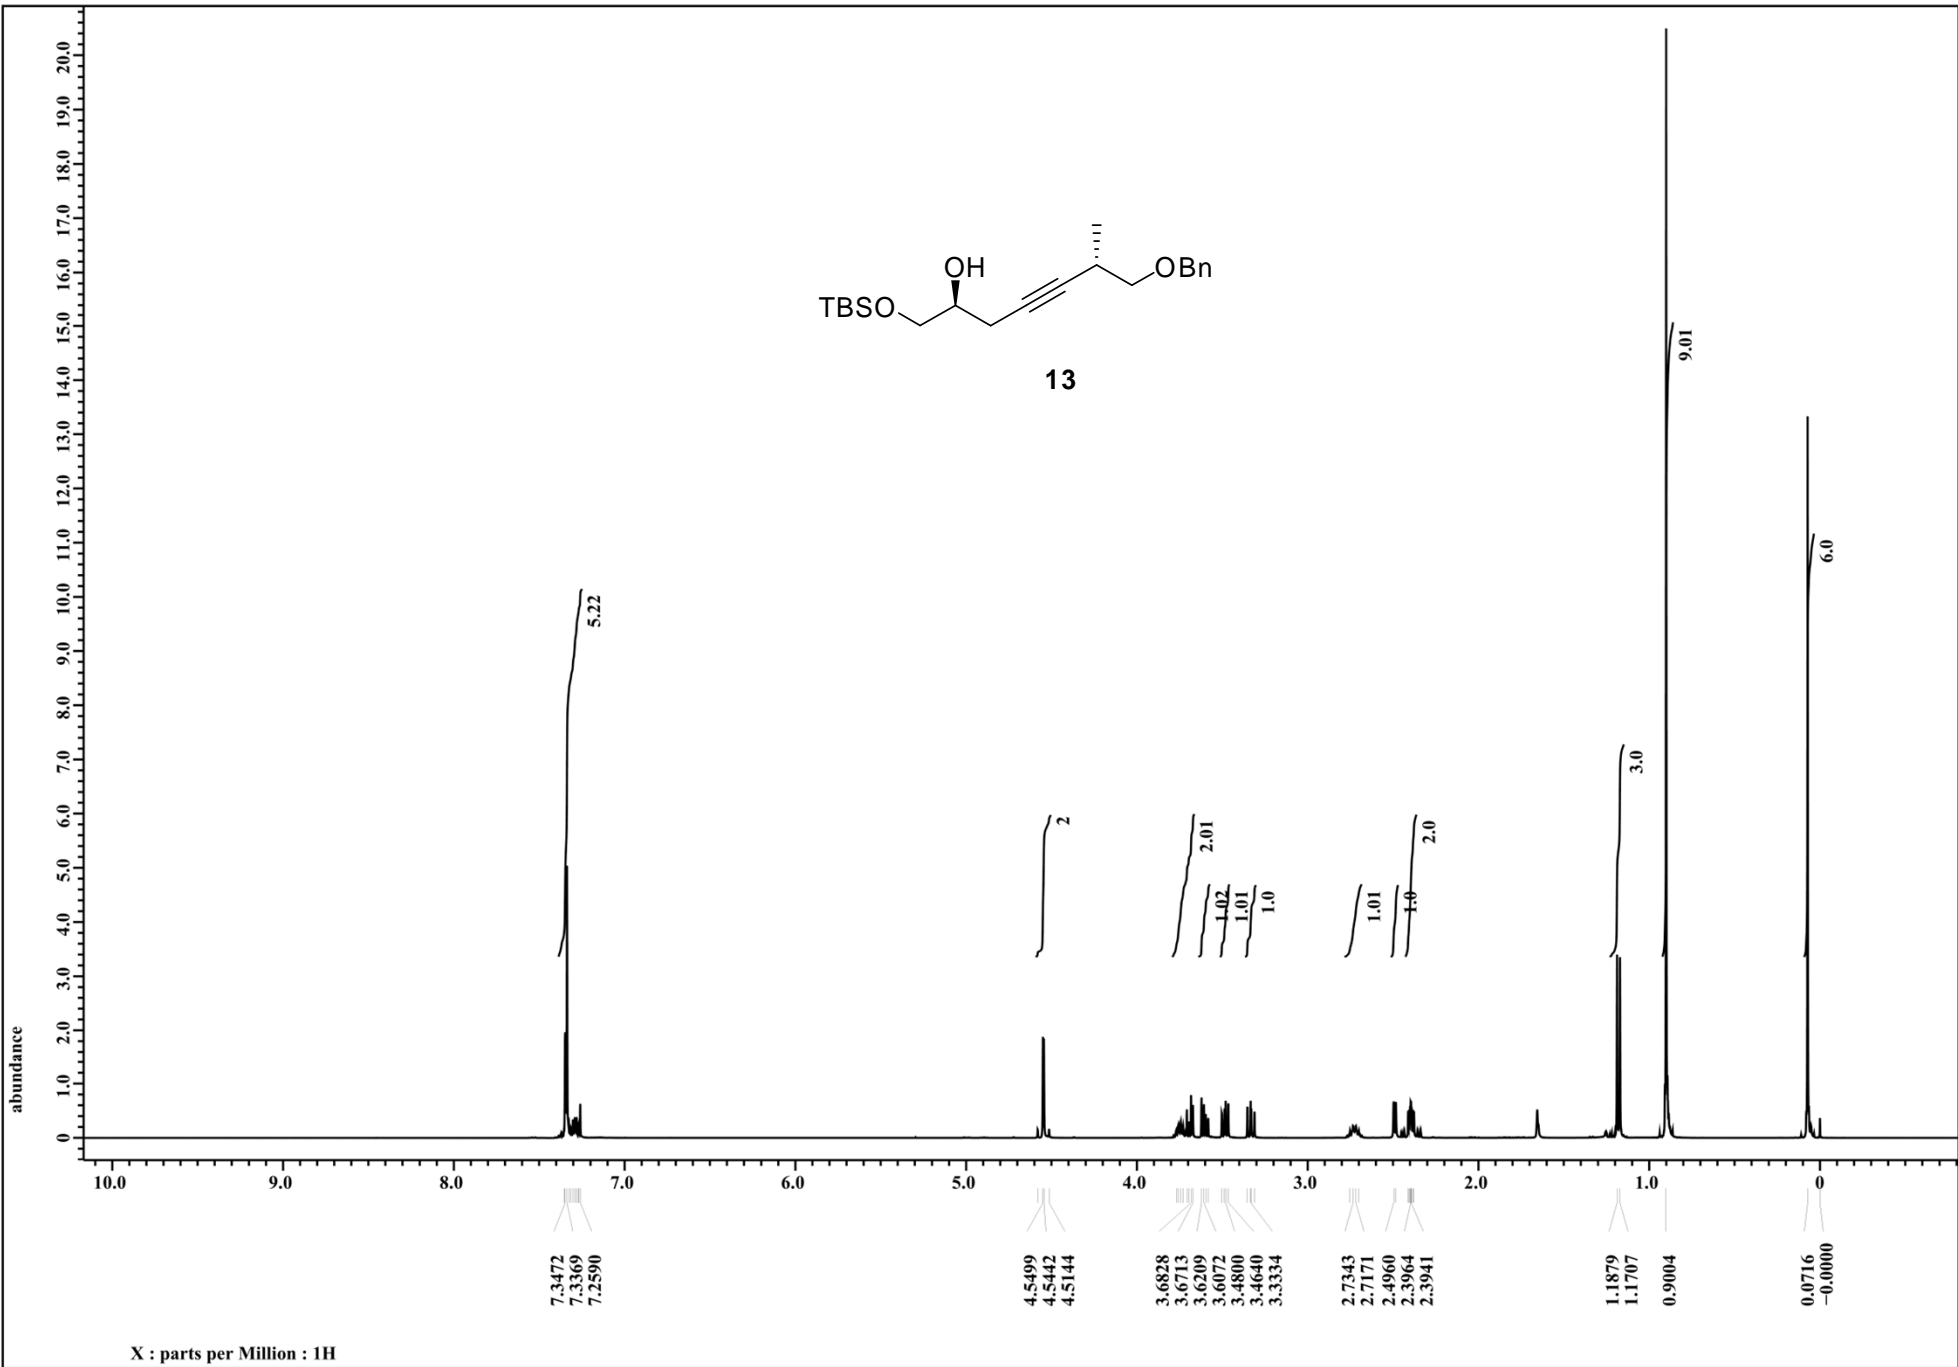

[illegible]

<sup>1</sup>H NMR (400 MHz, CDCl<sub>3</sub>/TMS)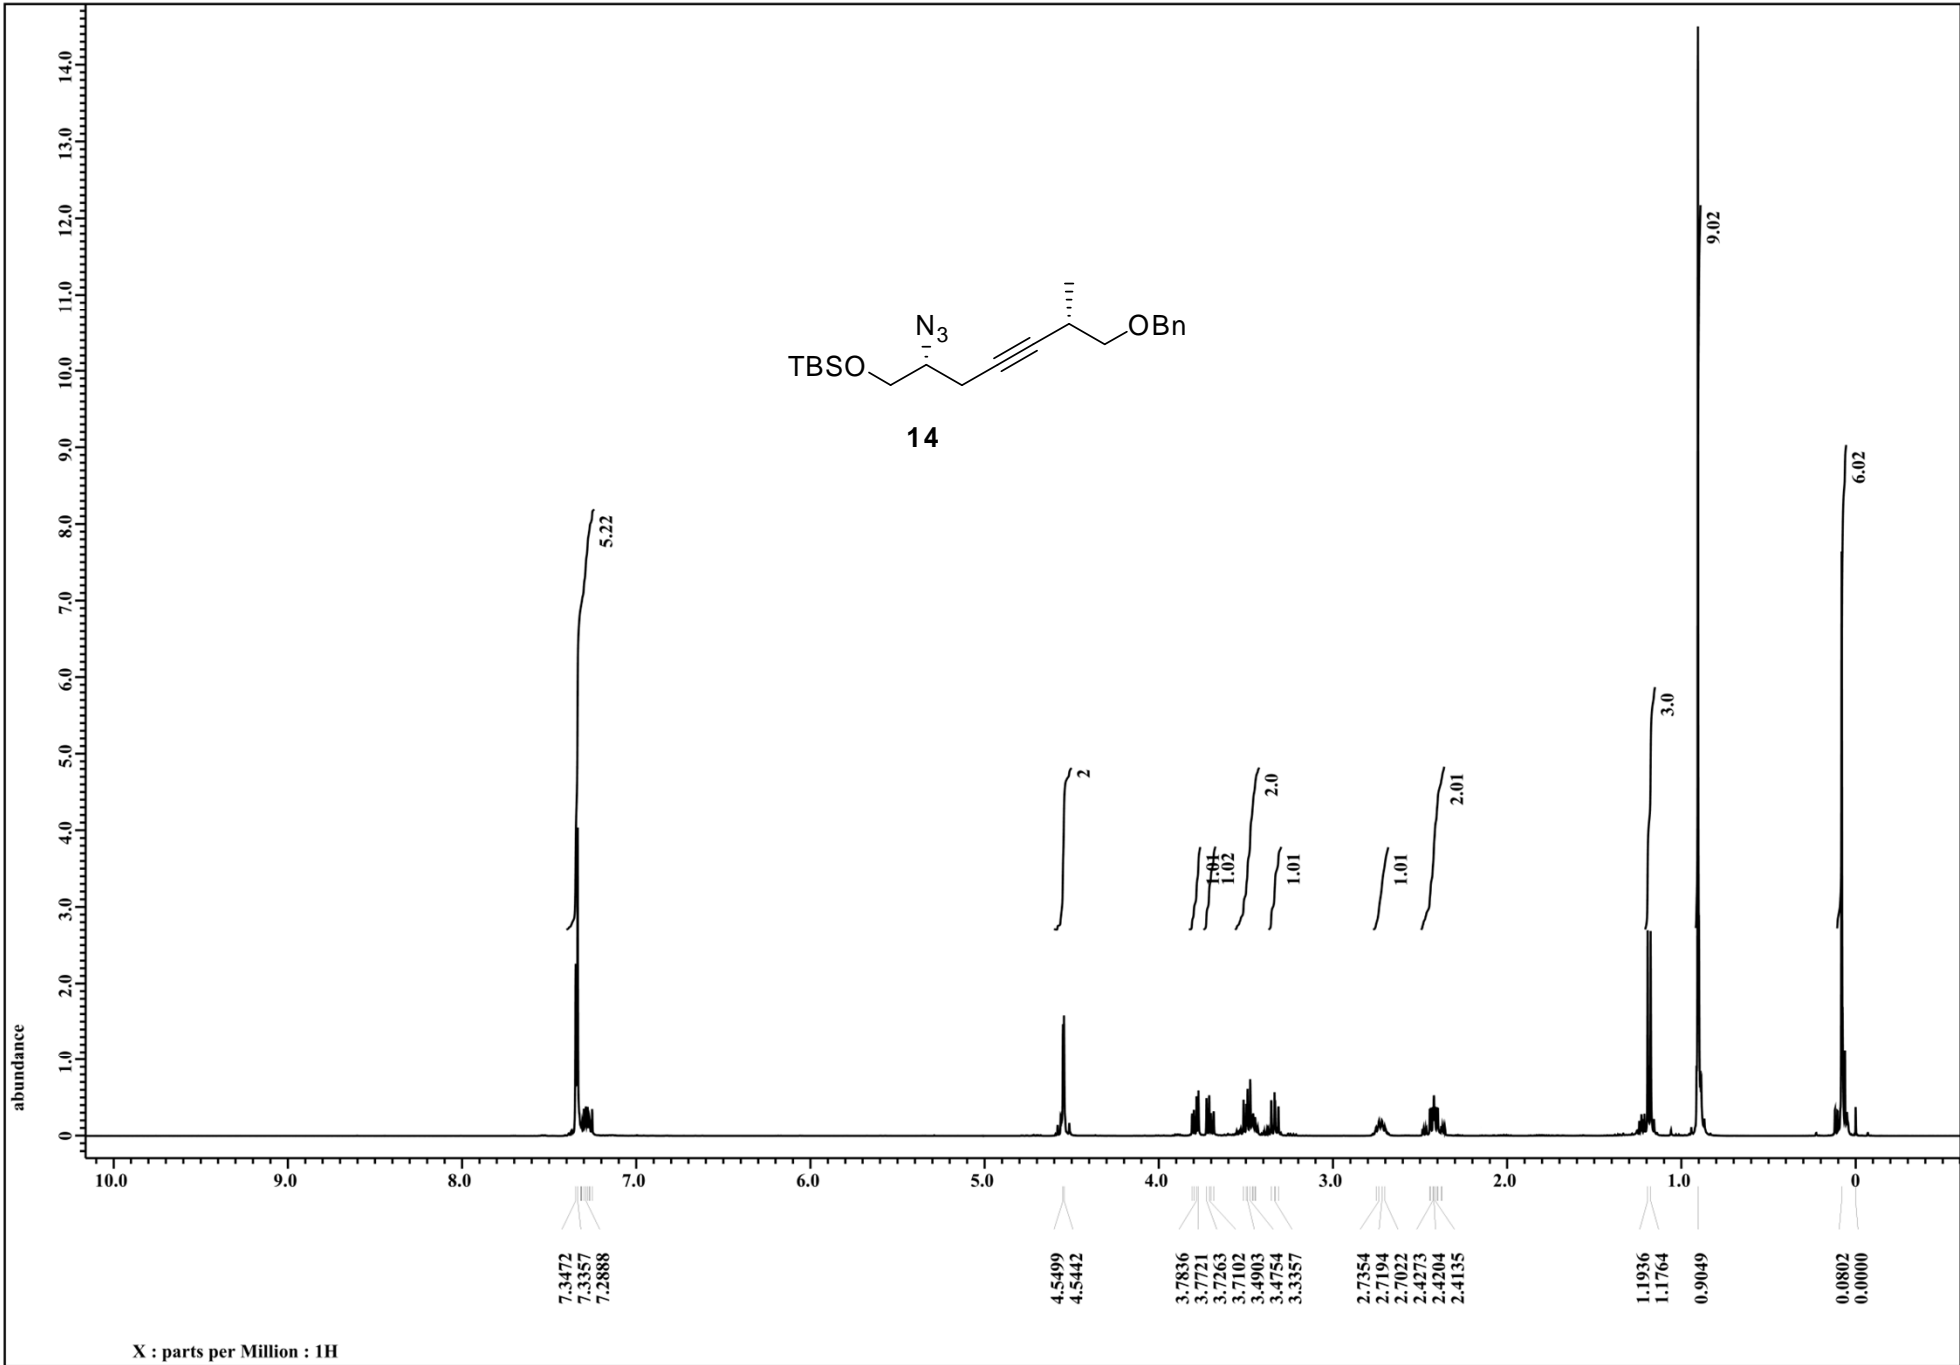

$^{13}\text{C}$  NMR (100 MHz,  $\text{CDCl}_3$ )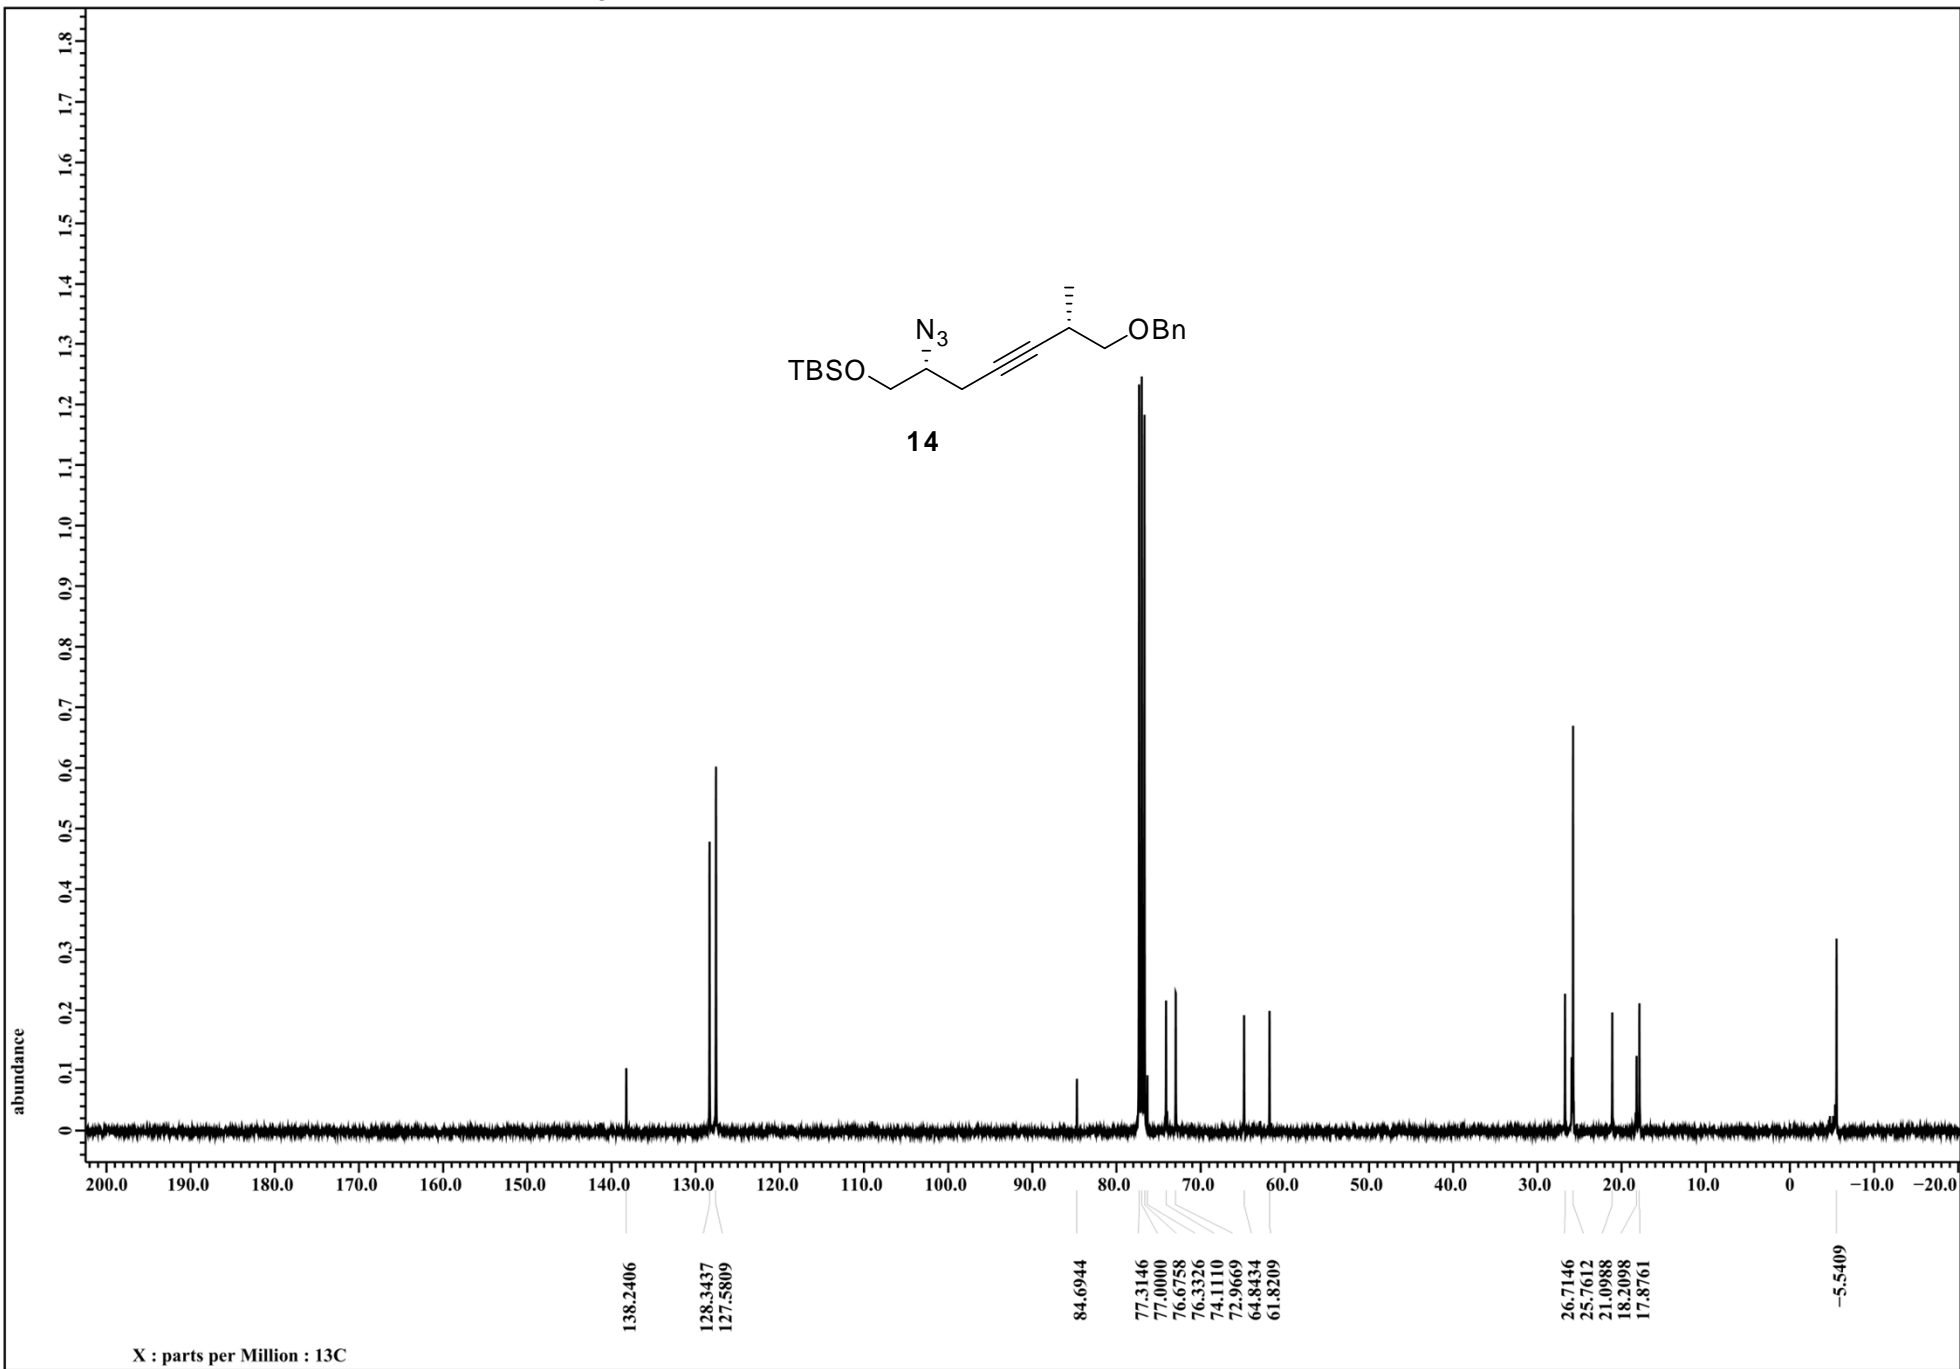

<sup>1</sup>H NMR (400 MHz, CDCl<sub>3</sub>/TMS)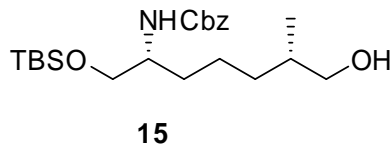

$^{13}\text{C}$  NMR (100 MHz,  $\text{CDCl}_3$ )

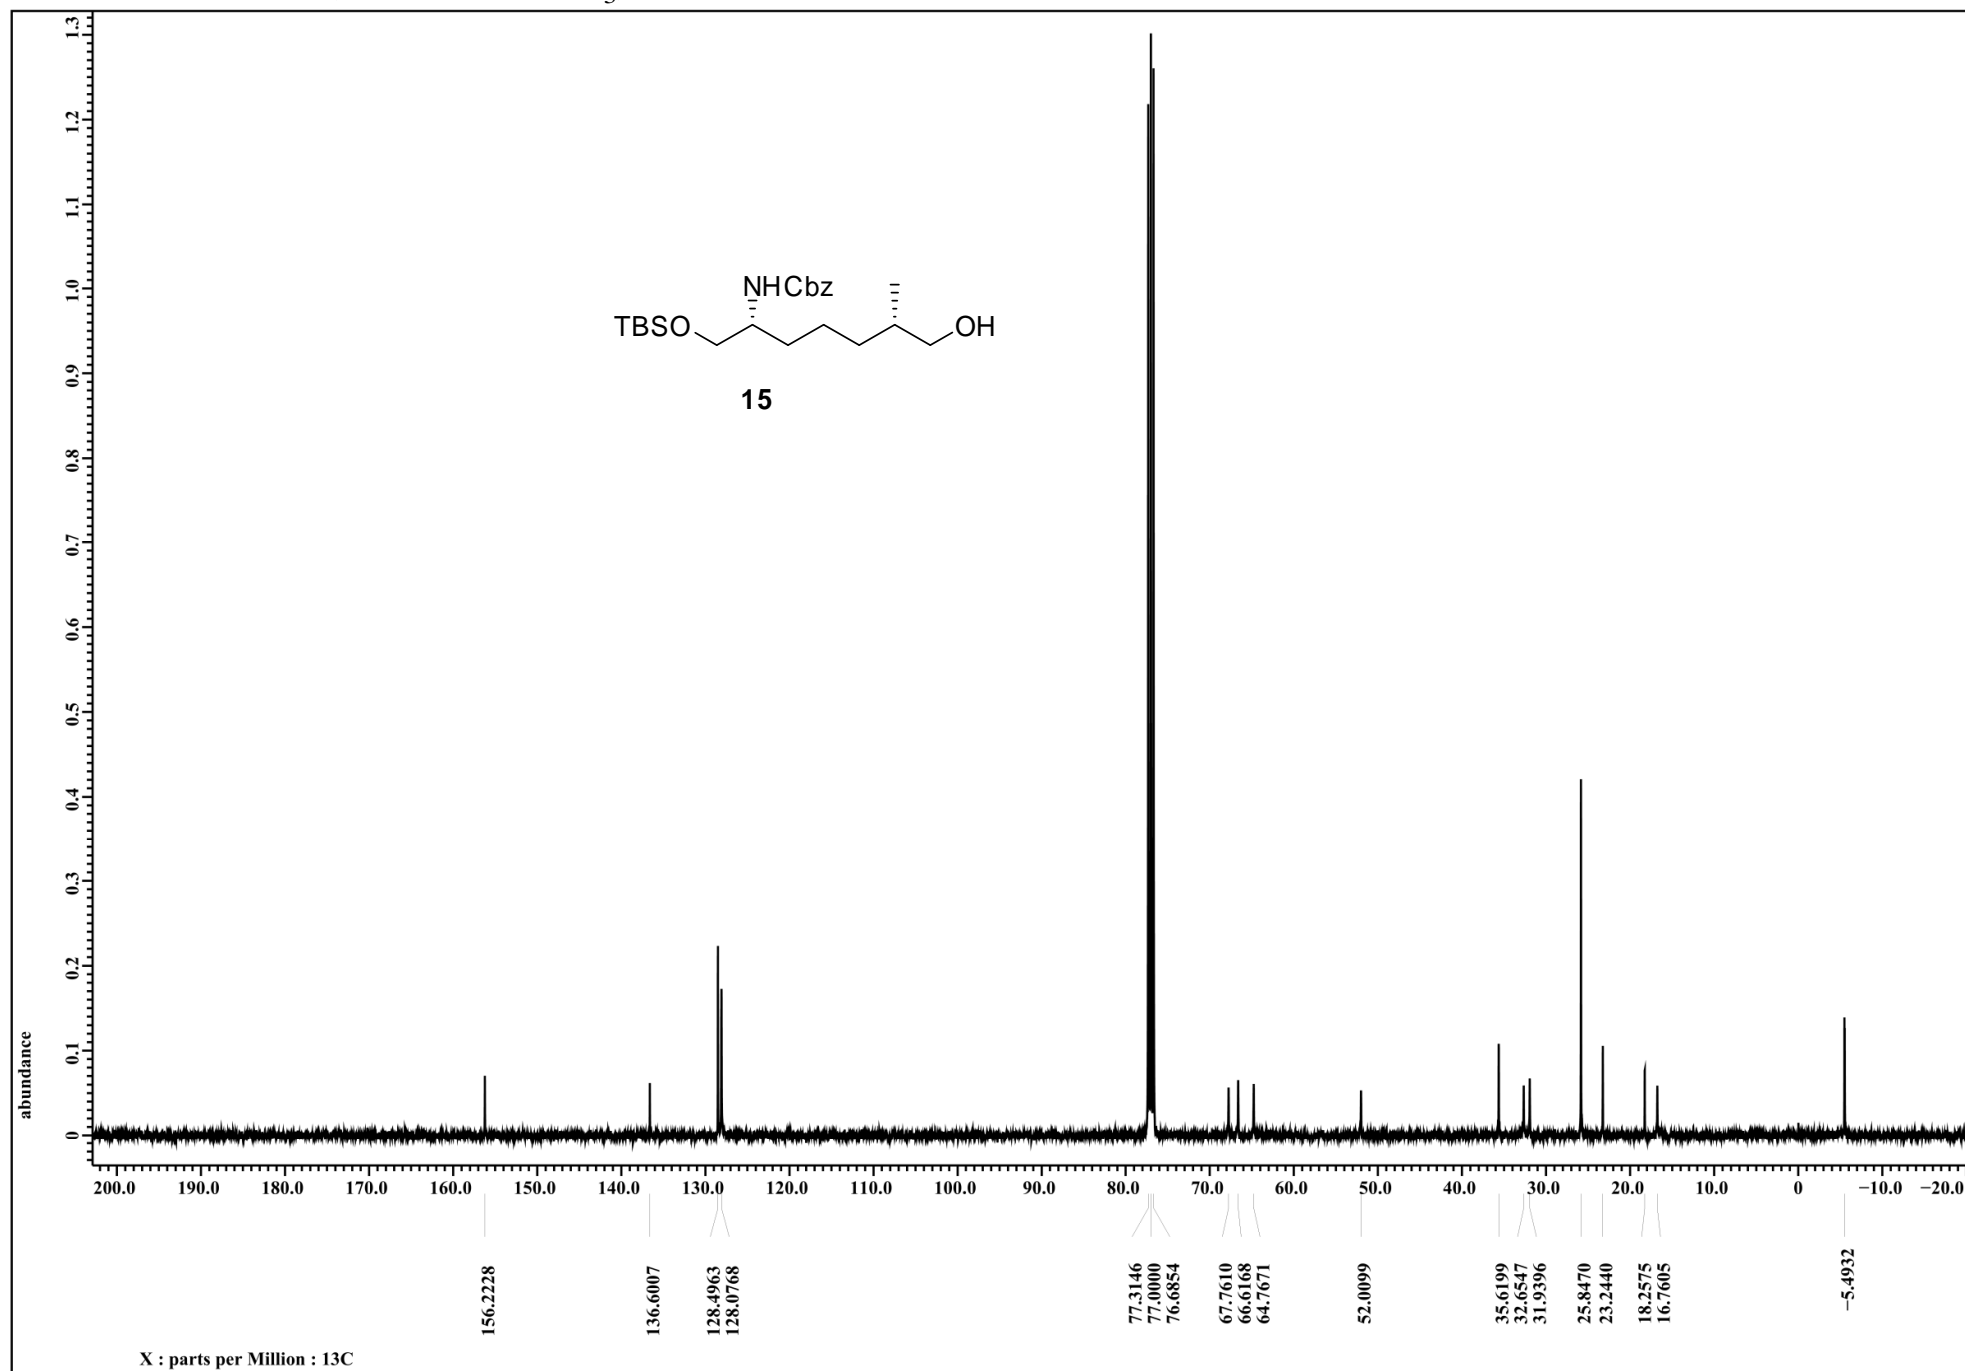

<sup>1</sup>H NMR (400 MHz, CDCl<sub>3</sub>/TMS)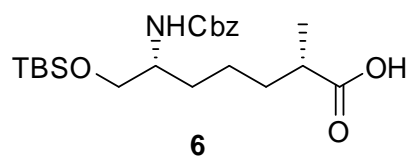



$^{13}\text{C}$  NMR (100 MHz,  $\text{CDCl}_3$ )

$^1\text{H}$  NMR (400 MHz,  $\text{CDCl}_3/\text{TMS}$ )

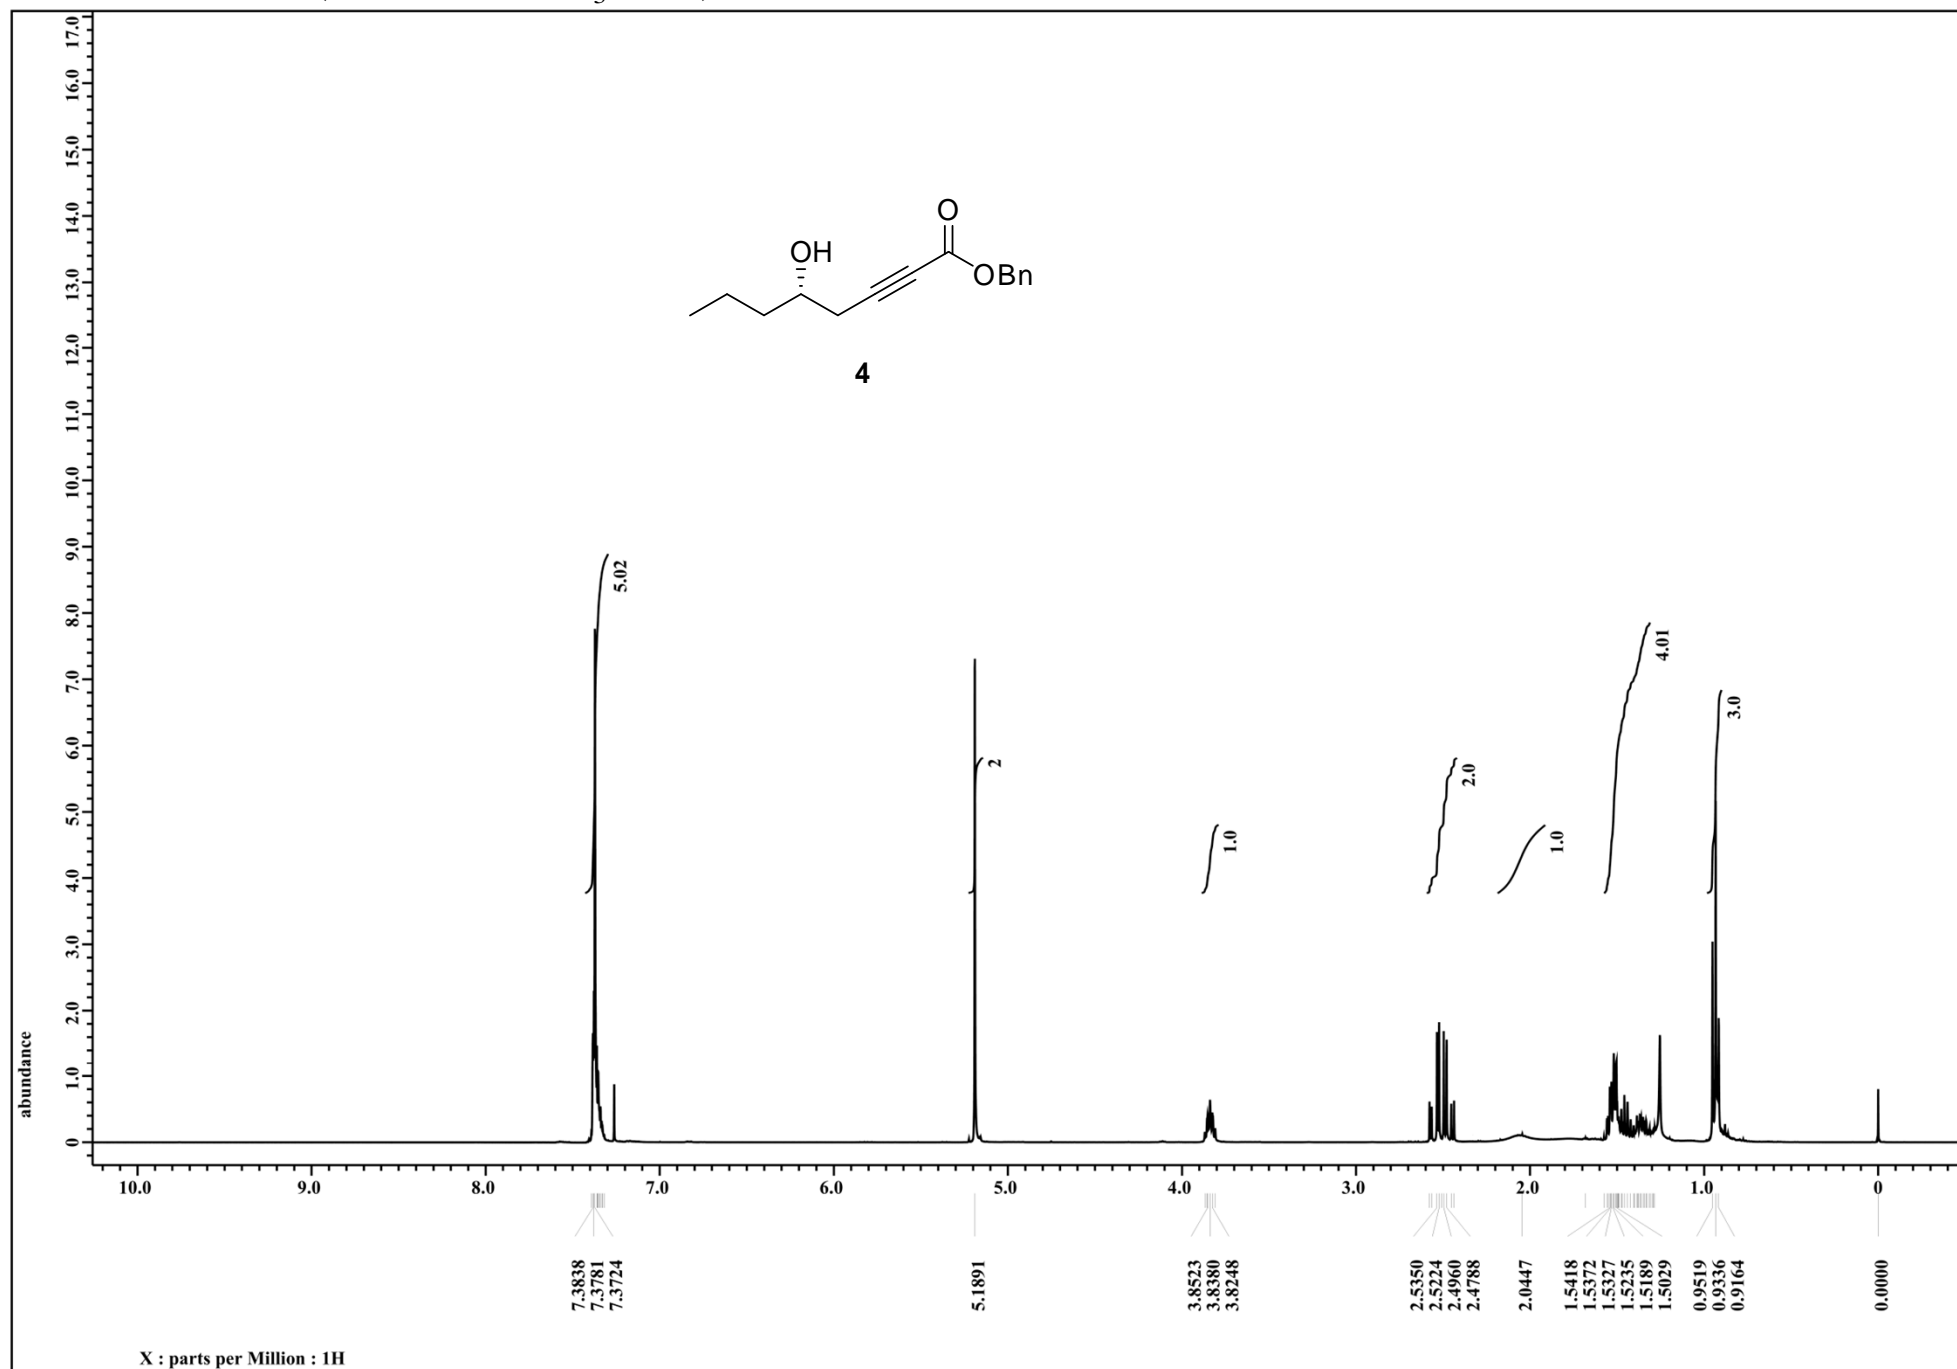

$^{13}\text{C}$  NMR (100 MHz,  $\text{CDCl}_3$ )

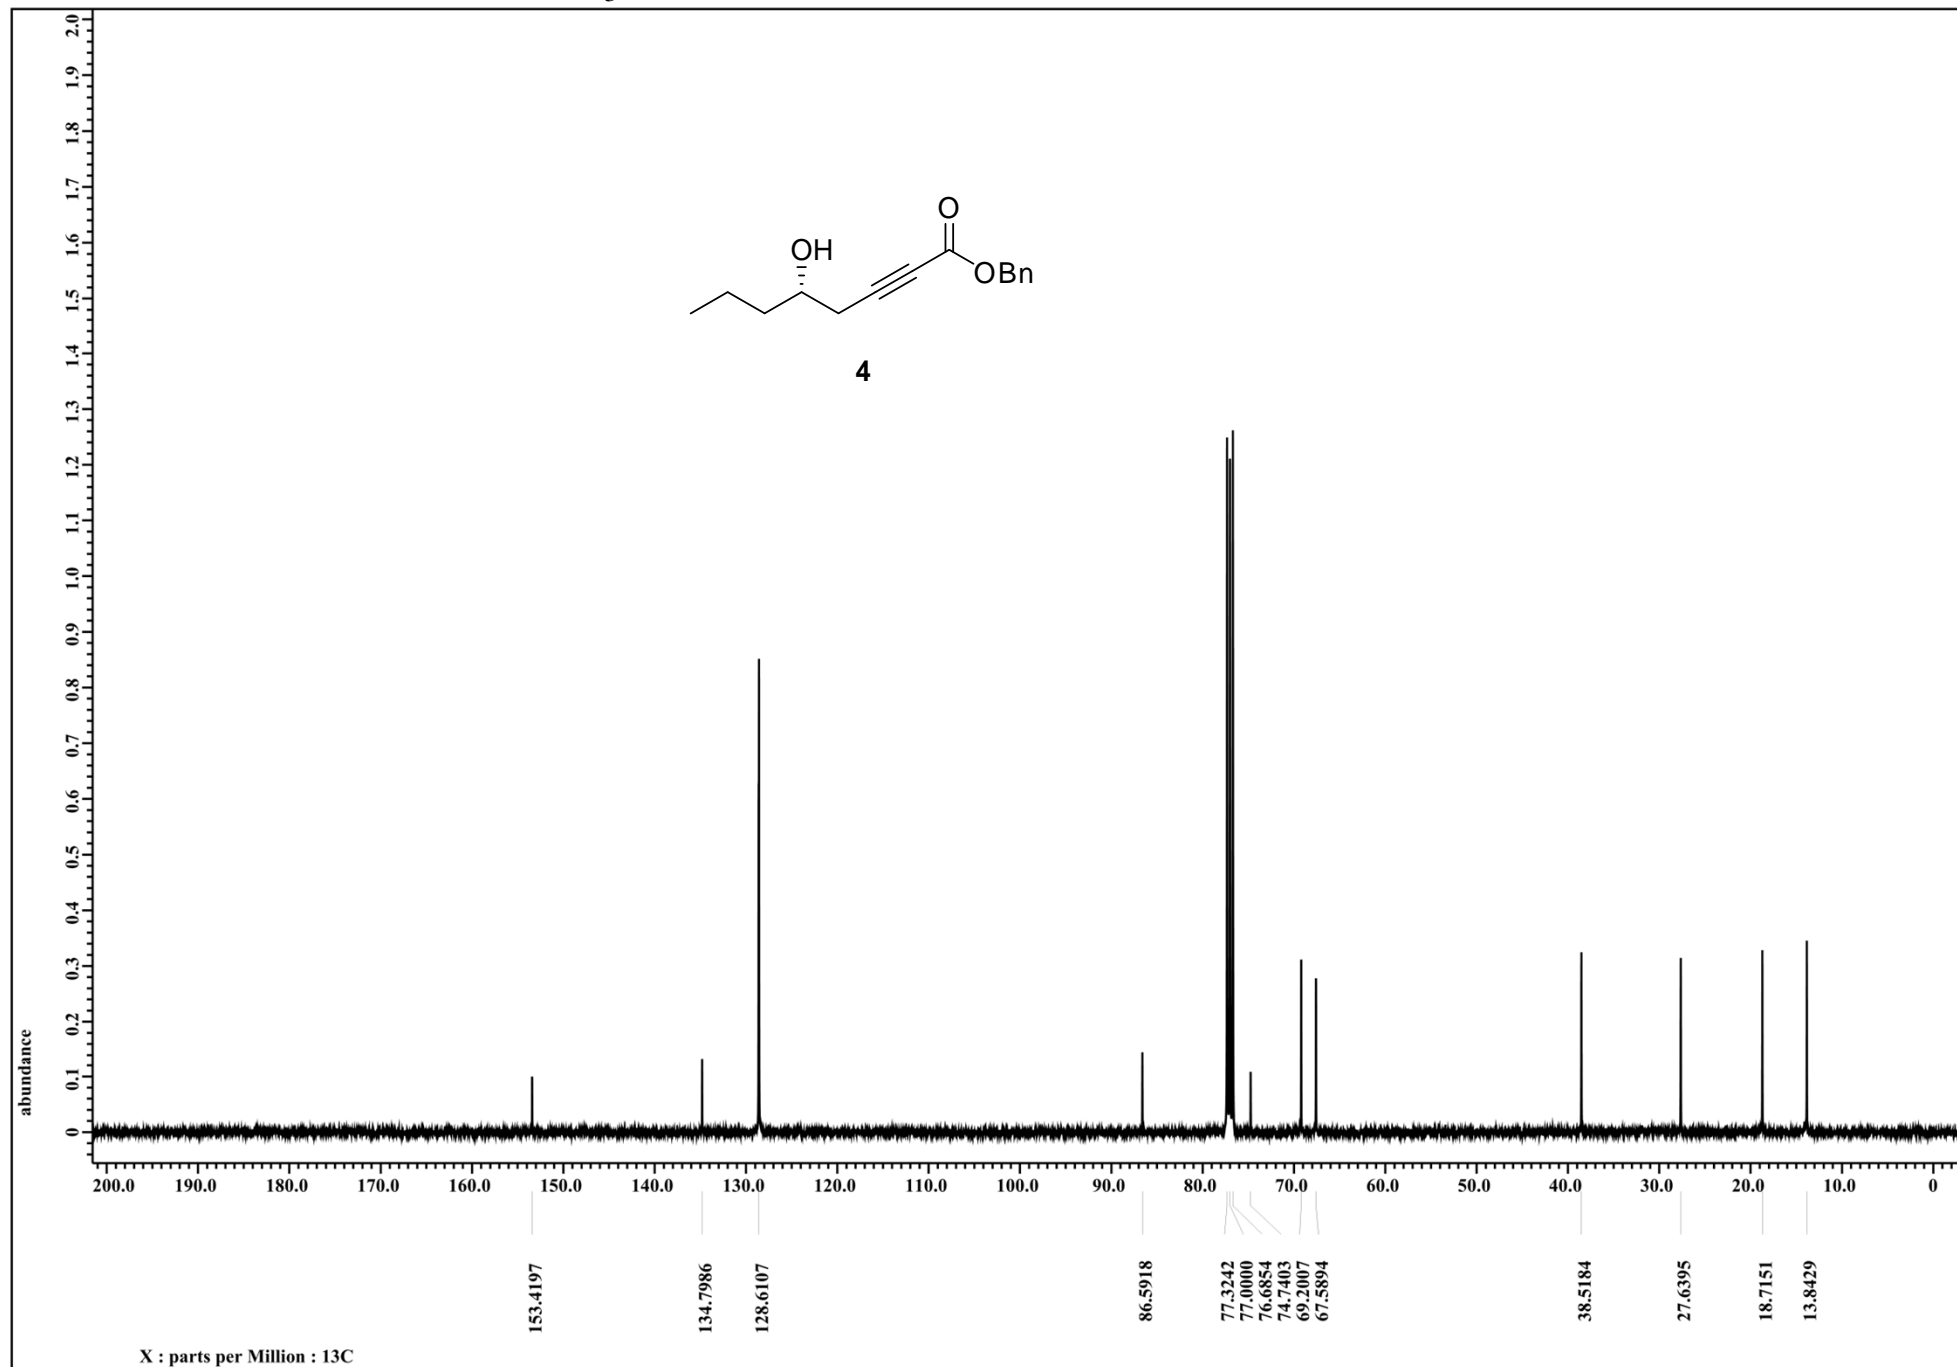

<sup>1</sup>H NMR (400 MHz, CDCl<sub>3</sub>/TMS)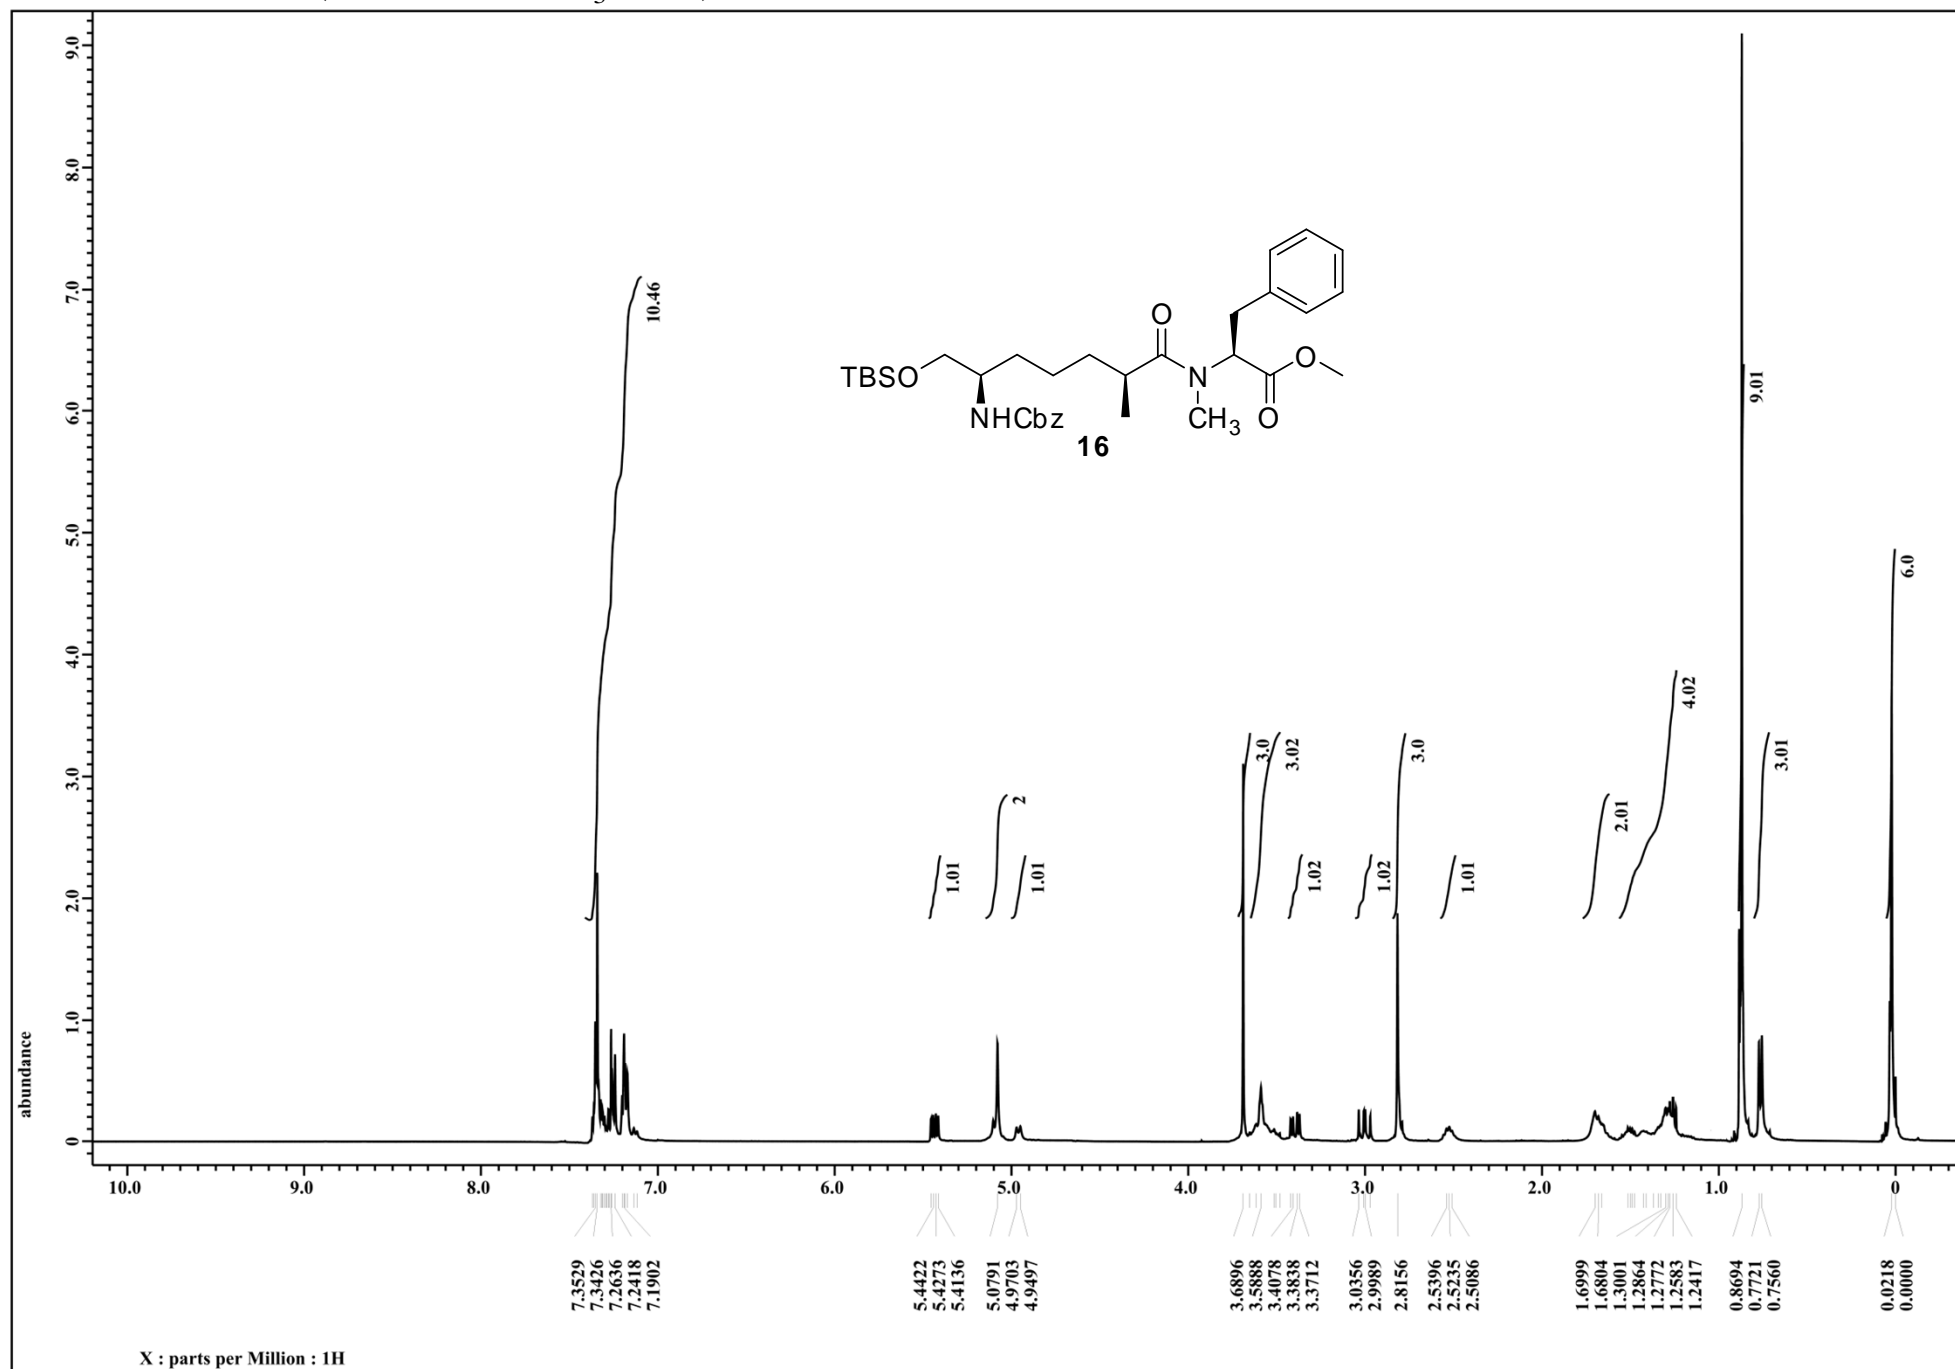

$^{13}\text{C}$  NMR (100 MHz,  $\text{CDCl}_3$ )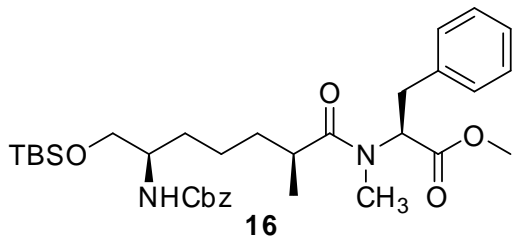

<sup>1</sup>H NMR (400 MHz, CDCl<sub>3</sub>/TMS)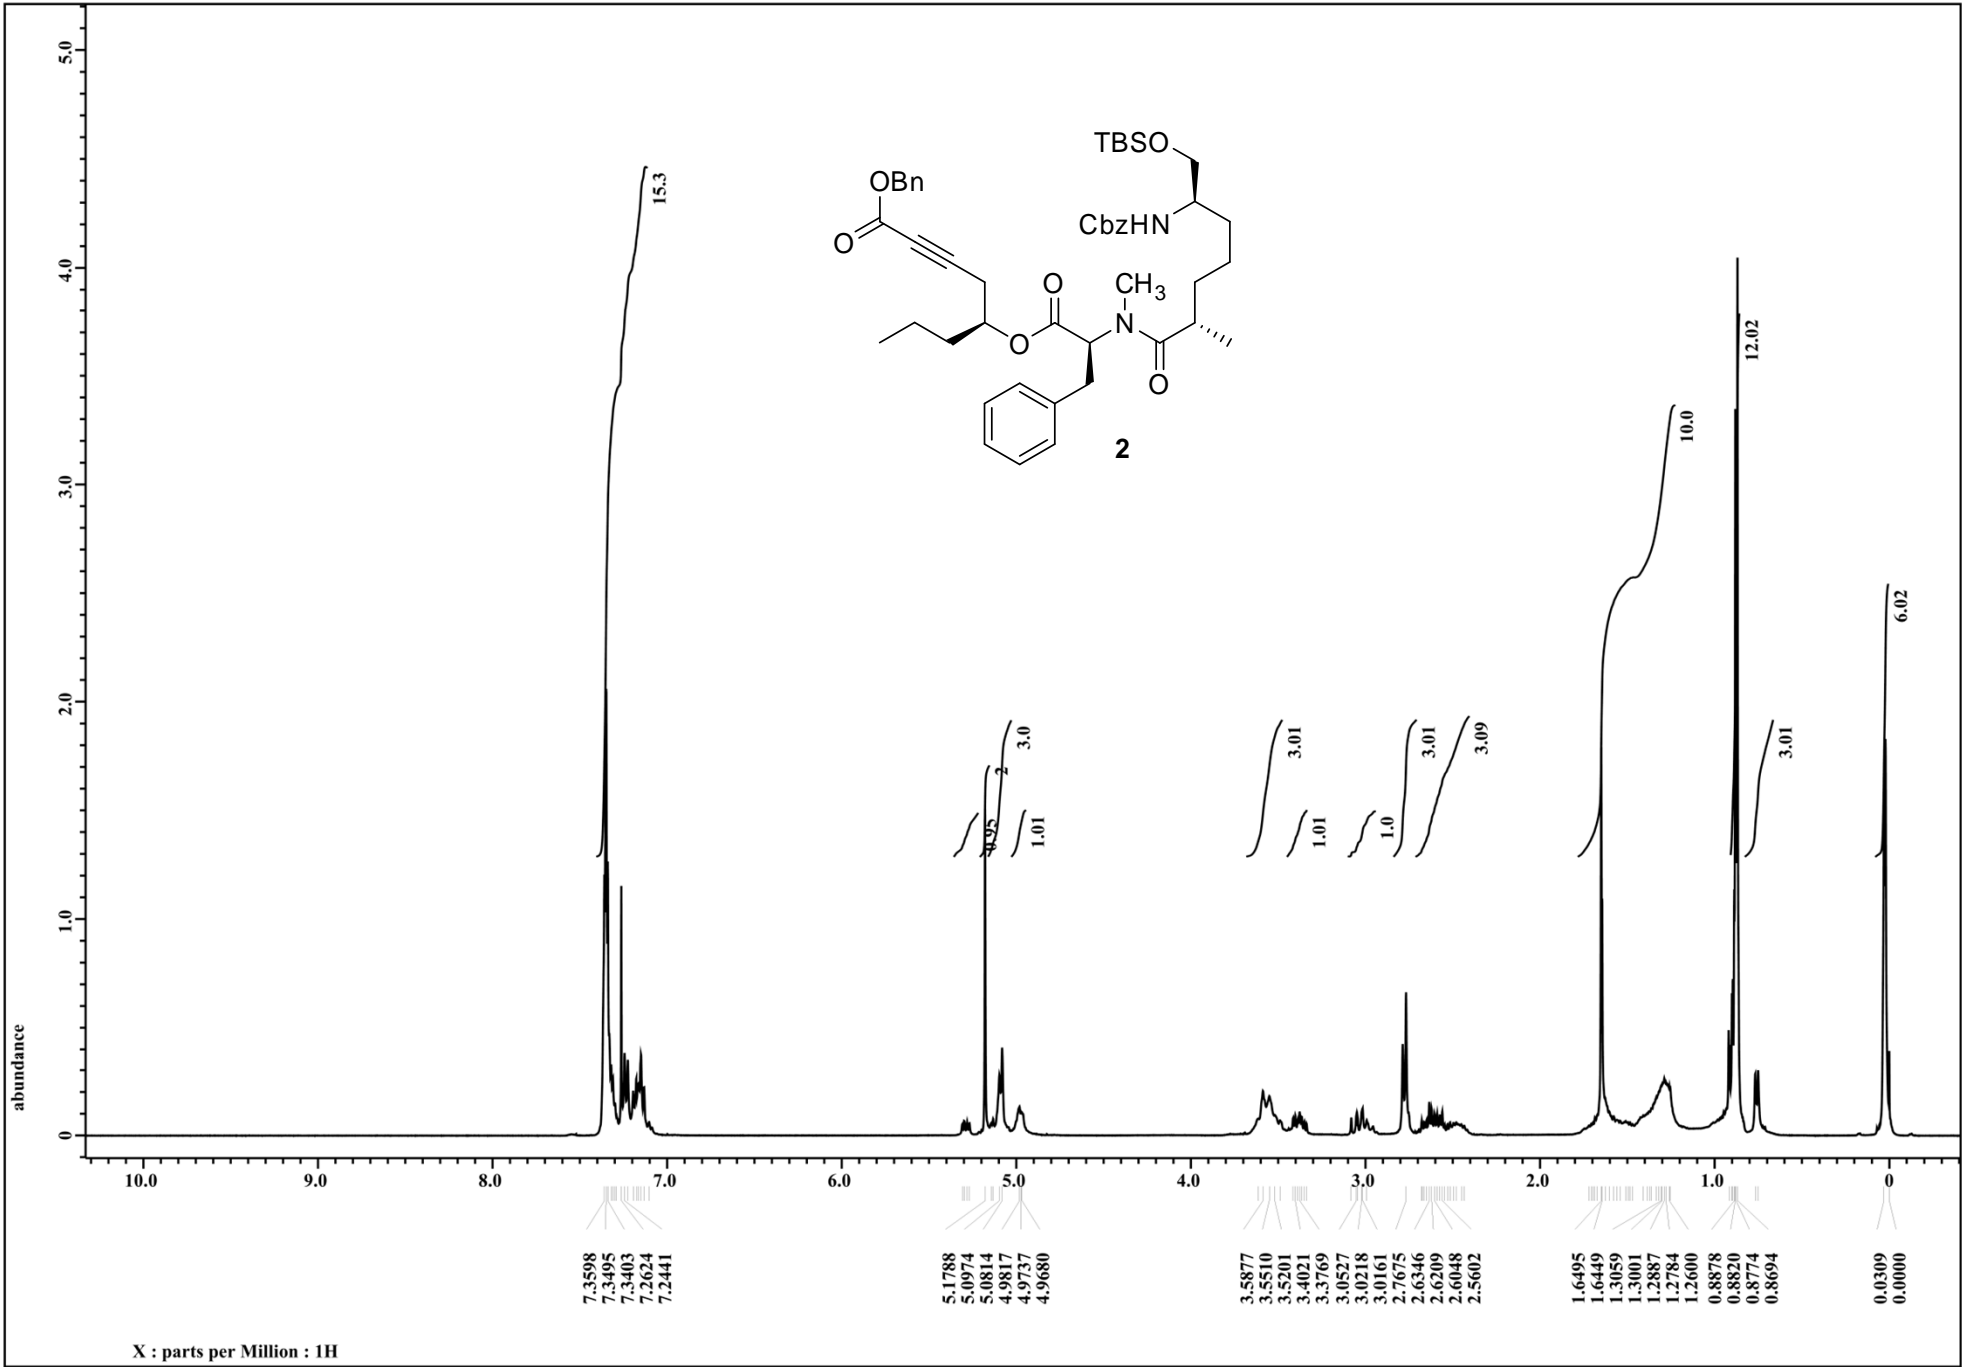

$^{13}\text{C}$  NMR (100 MHz,  $\text{CDCl}_3$ )

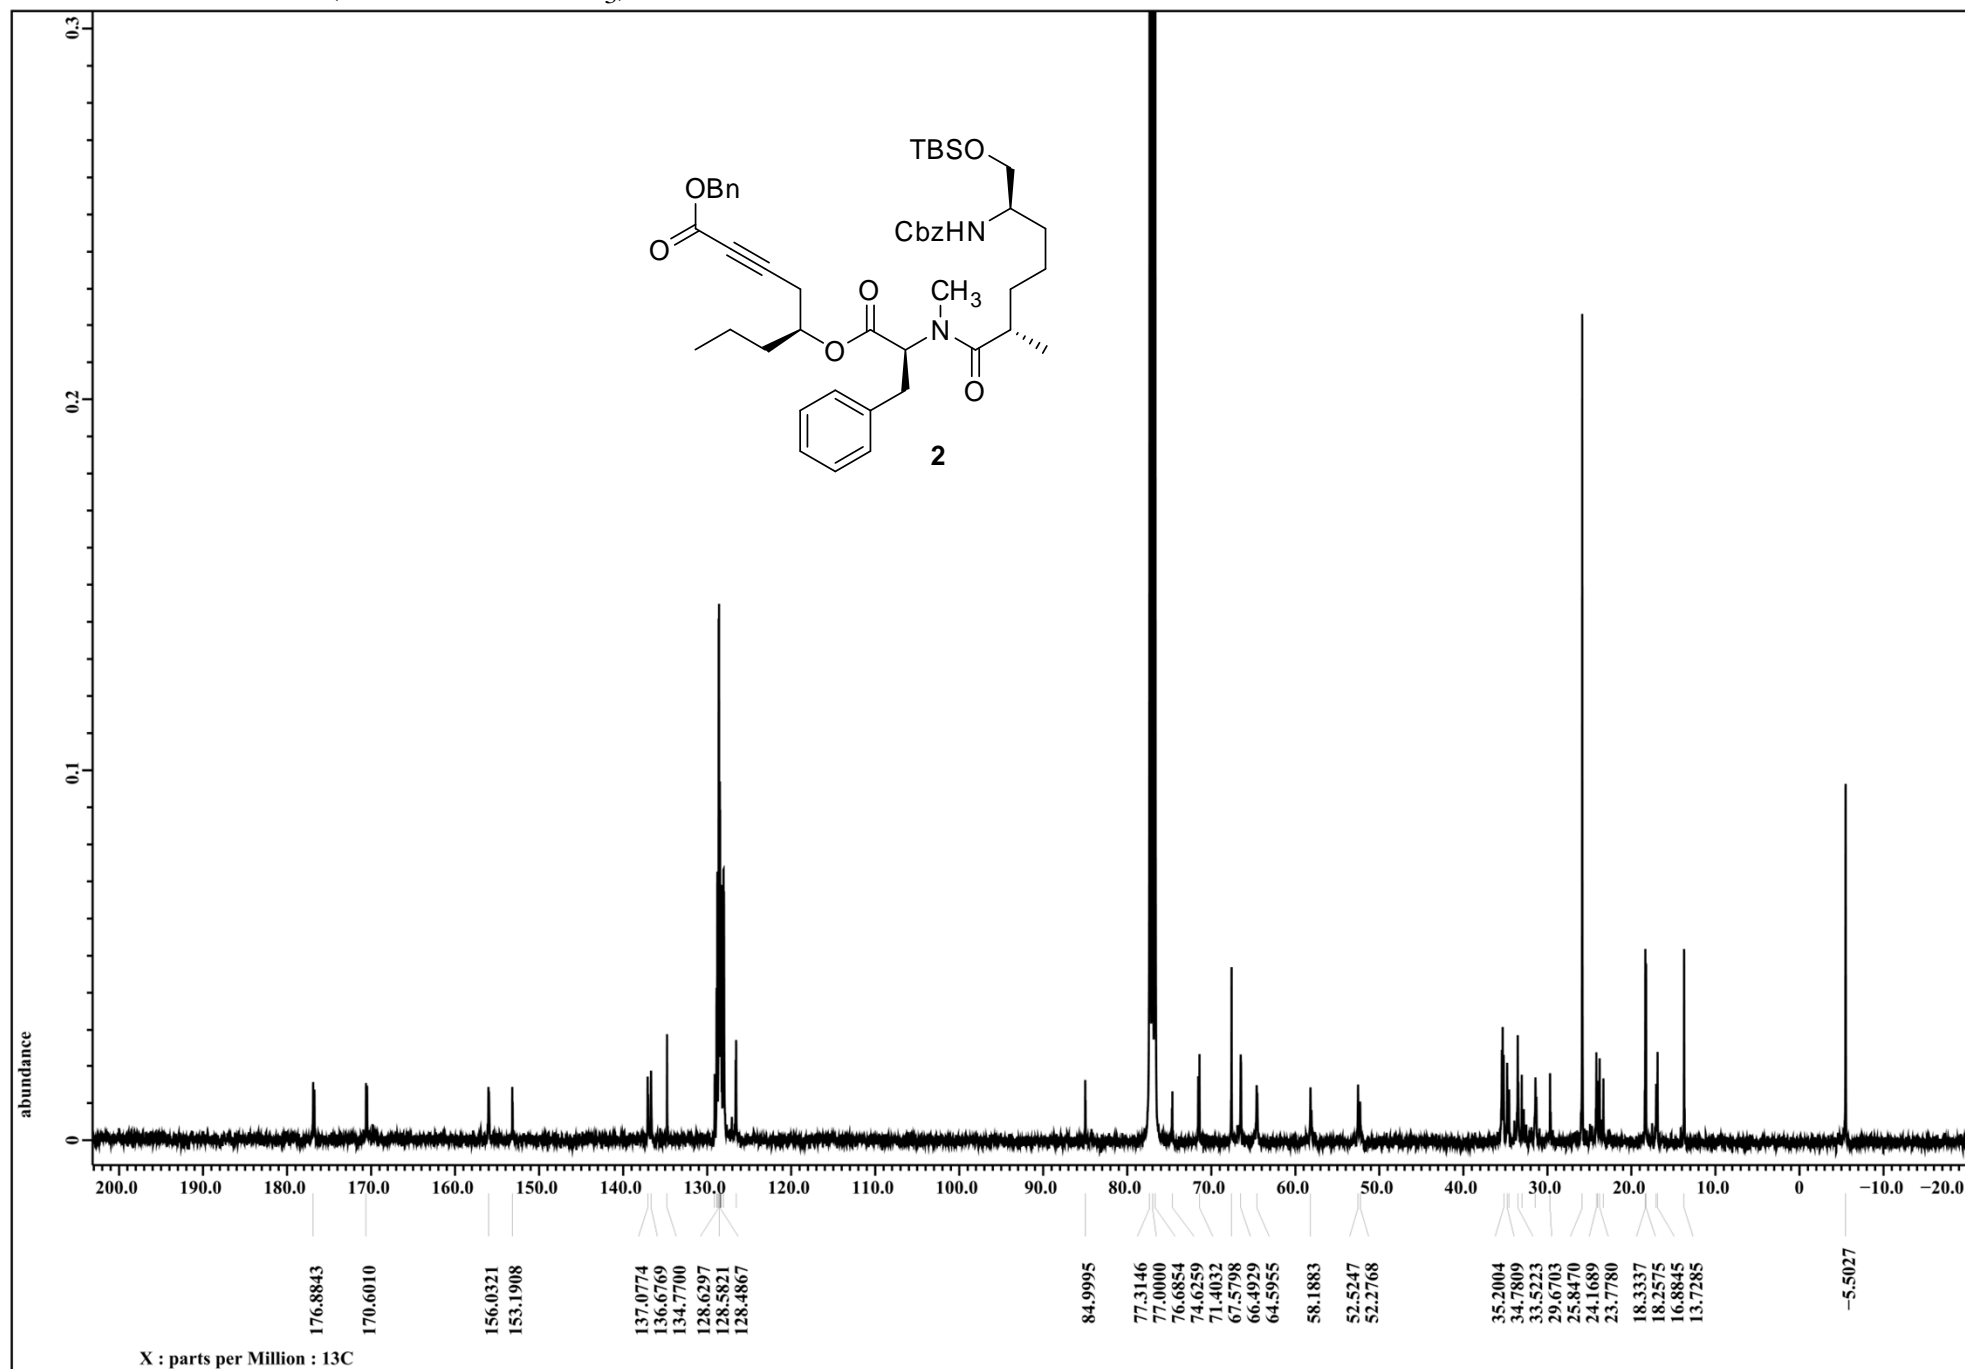

$^1\text{H}$  NMR (400 MHz,  $\text{CDCl}_3/\text{TMS}$ )

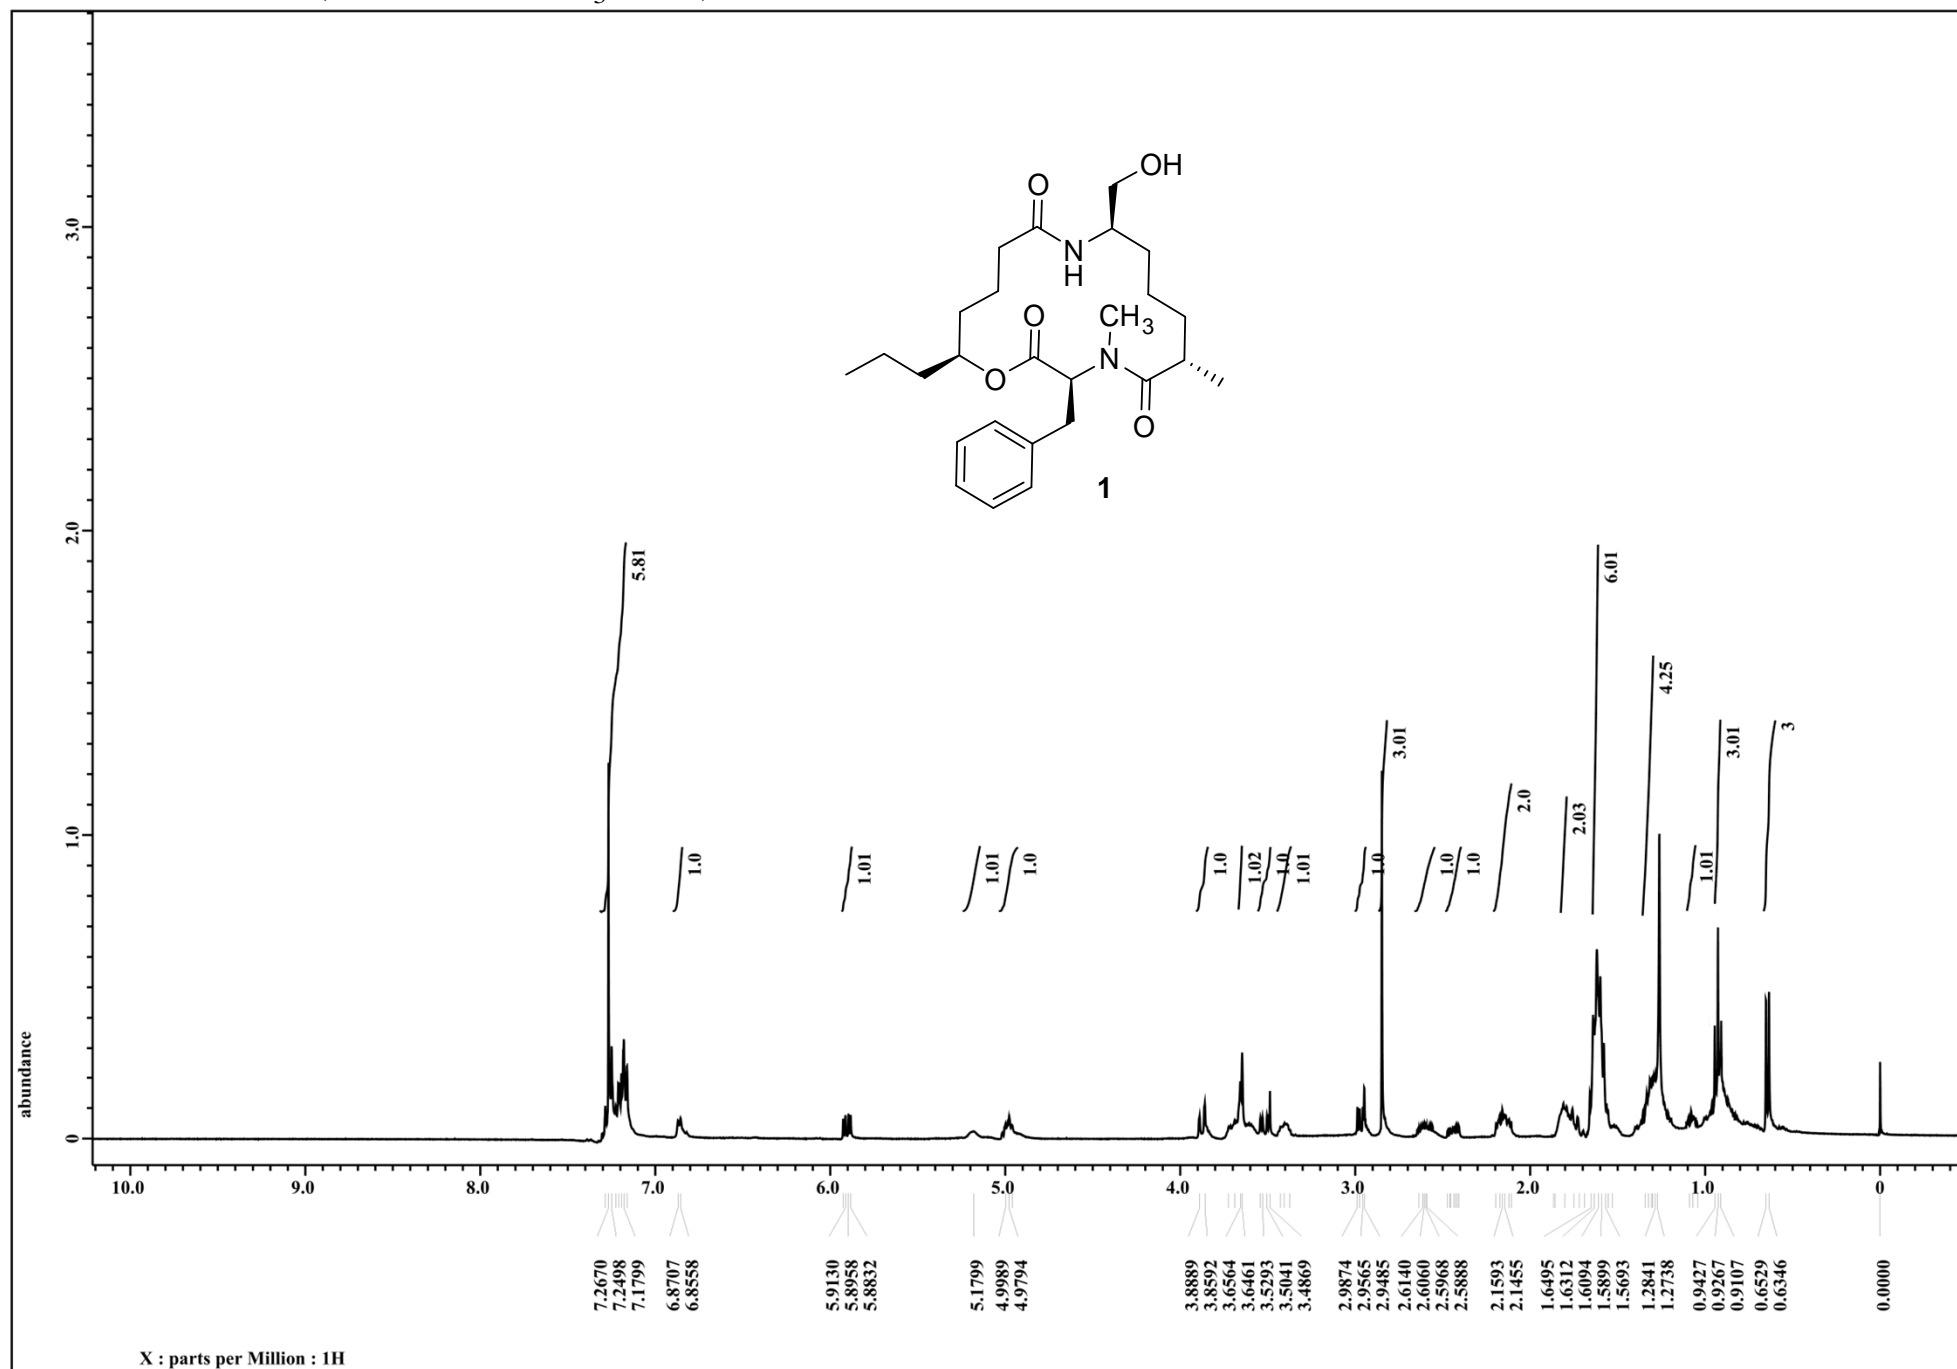



$^{13}\text{C}$  NMR (100 MHz,  $\text{CDCl}_3$ )

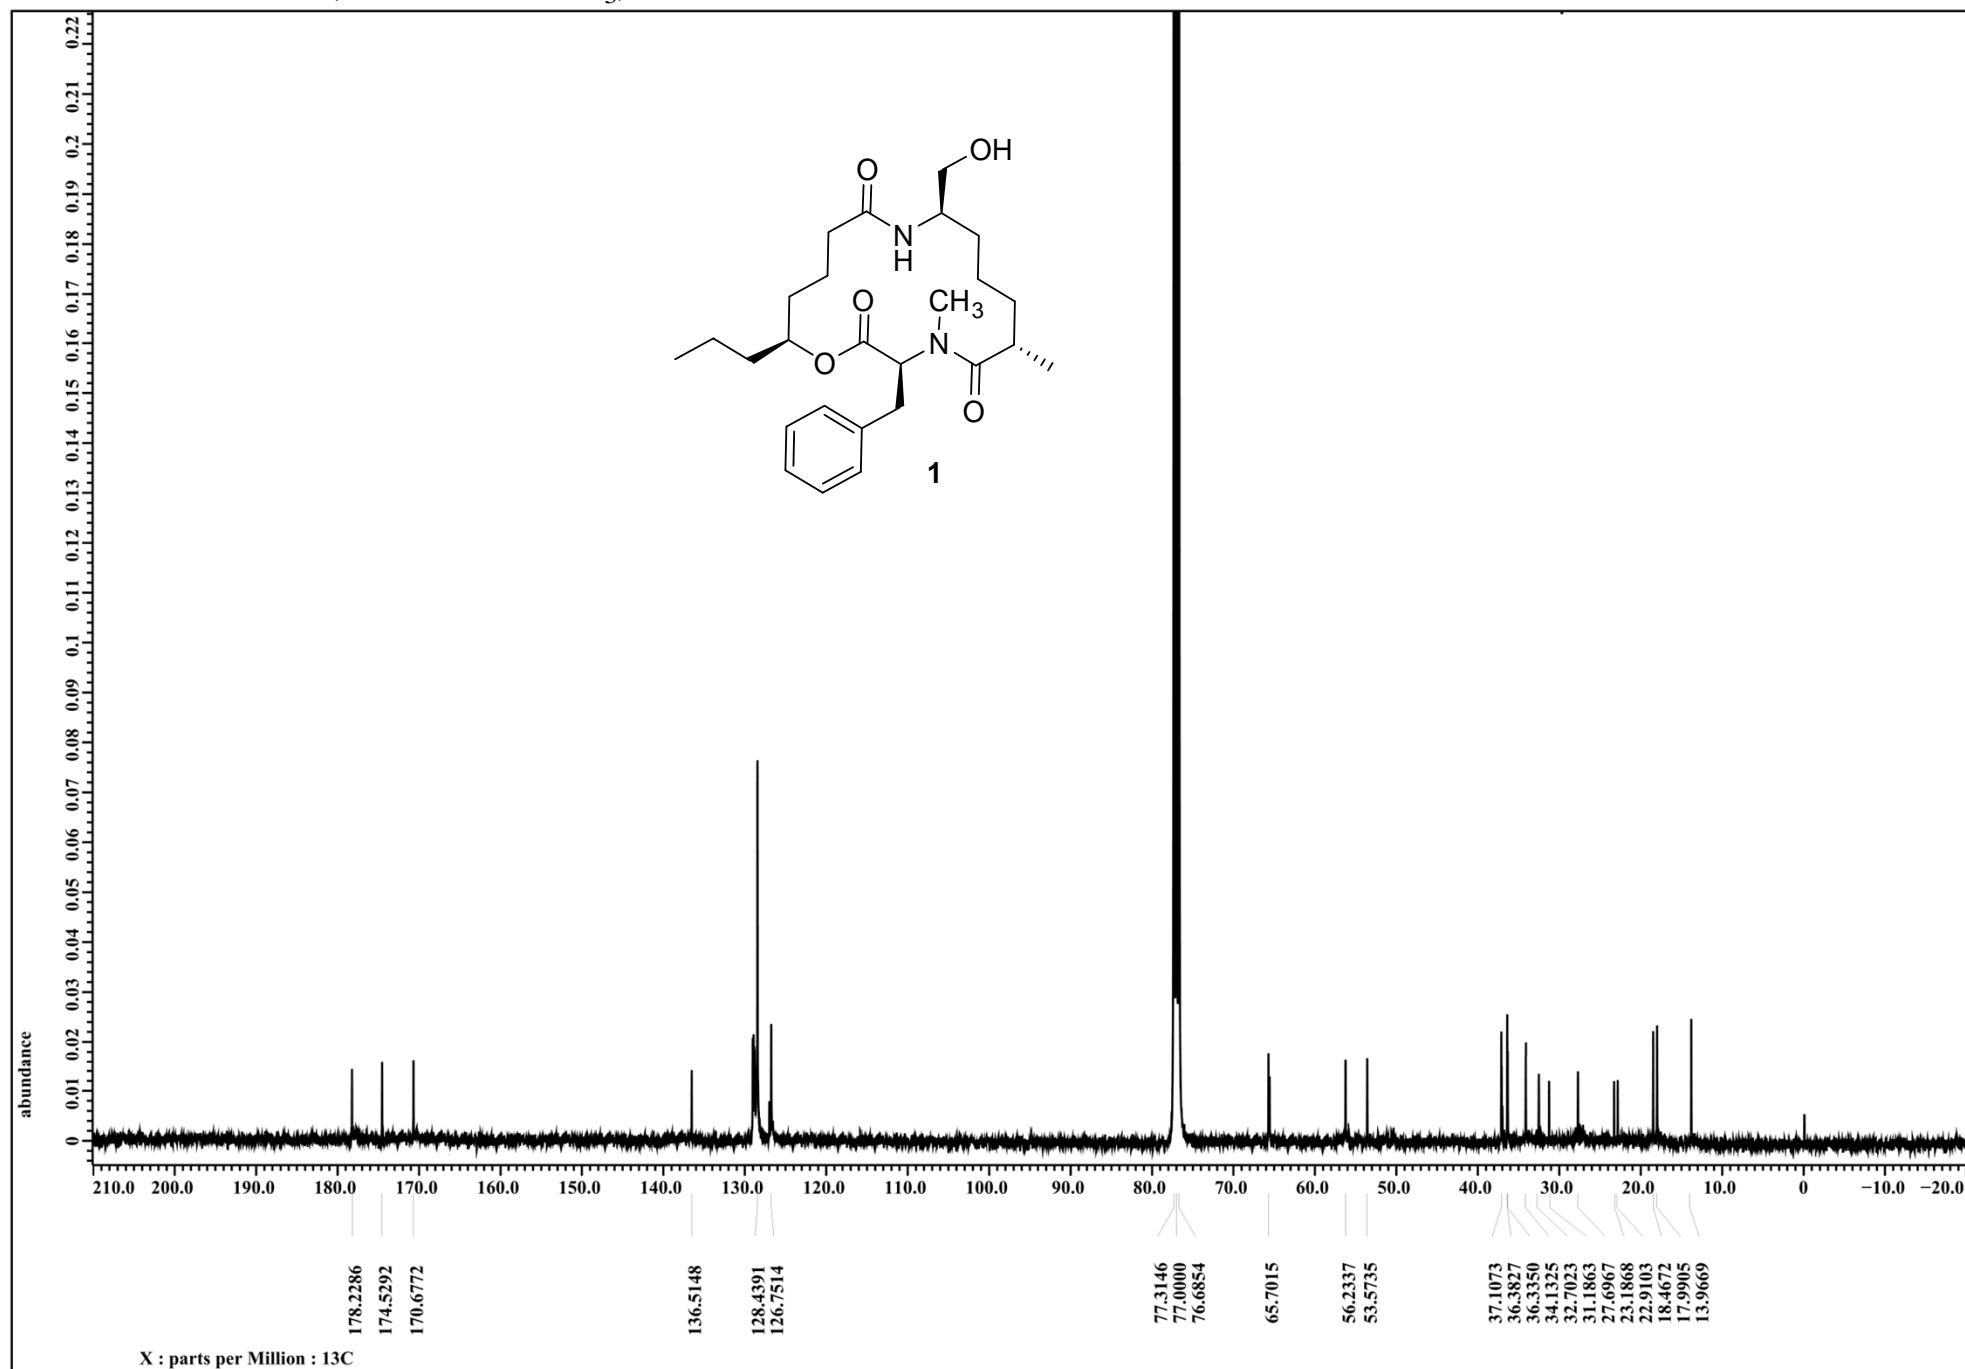

| Synthetic Haliclamide <b>1</b> |                  |                                                | Natural Haliclamide |                                               |
|--------------------------------|------------------|------------------------------------------------|---------------------|-----------------------------------------------|
| Atom no.                       | $\delta_C$ (ppm) | $\delta_H$ (ppm, <i>J</i> in Hz )              | $\delta_C$ (ppm)    | $\delta_H$ (ppm, <i>J</i> in Hz )             |
| 1                              | 170.7            |                                                | 170.7               |                                               |
| 2                              | 56.2             | 5.90, dd (11.9, 5.06)                          | 56.2                | 5.90, dd (12.4, 5.6)                          |
| 3                              | 34.1             | 2.96, dd (15.5, 12.4)<br>3.51, dd (15.1, 5.04) | 34.1                | 2.94, dd (14.6, 12.4)<br>3.51, dd (14.6, 5.6) |
| 4                              | 136.5            |                                                | 136.5               |                                               |
| 5/5'                           | 128.5            | 7.27, m                                        | 128.4               | 7.27, t (7.7)                                 |
| 6/6'                           | 128.4            | 7.18, m                                        | 128.4               | 7.18, t (7.7)                                 |
| 7                              | 126.8            | 7.20, m                                        | 126.7               | 7.20, t (7.7)                                 |
| NMe                            | 31.2             | 2.84, s                                        | 31.2                | 2.83, s                                       |
| 8                              | 178.2            |                                                | 178.2               |                                               |
| 9                              | 36.4             | 2.60, m                                        | 36.4                | 2.60, m                                       |
| 10                             | 18.0             | 0.65, d (7.0)                                  | 18.0                | 0.63, d (6.8)                                 |
| 11                             | 31.2             | 1.74, m<br>1.29, m                             | 31.3                | 1.72, m<br>1.20, m                            |
| 12                             | 23.2             | 1.55, m<br>1.07, m                             | 23.2                | 1.45, m<br>1.02, m                            |
| 13                             | 27.7             | 2.15, m<br>1.26, m                             | 27.7                | 2.14, m<br>1.25, m                            |
| 14                             | 53.6             | 3.41, br m                                     | 53.6                | 3.40, br m                                    |
| 15                             | 65.7             | 3.68, brd (4.12)                               | 65.7                | 3.68, br dd (11.6, 4.3)<br>3.87, d (11.6)     |
| OH                             |                  | 3.87, d (11.8)                                 |                     |                                               |
| NH                             |                  | 5.17 br s                                      |                     |                                               |
| 16                             | 174.5            | 6.86 br d (5.96)                               | 174.5               | 6.82, br d (5.6)                              |
| 17                             | 36.3             | 2.43, m<br>2.18, m                             | 36.0                | 2.43, m<br>2.18, m                            |
| 18                             | 22.9             | 1.77, m                                        | 22.9                | 1.77, m<br>1.60, m                            |
| 19                             | 32.7             | 1.62, m<br>1.45, m                             | 31.9                | 1.62, m<br>1.45, m                            |
| 20                             | 77.0             | 4.98, m                                        | 77.0                | 4.98, m                                       |
| 21                             | 37.1             | 1.55, m<br>1.48, m                             | 37.1                | 1.55, m<br>1.50, m                            |
| 22                             | 18.5             | 1.32, m                                        | 18.5                | 1.32, m                                       |
| 23                             | 14.0             | 0.93, t (7.3)                                  | 13.9                | 0.92, t (7.3)                                 |
